# Supplementary material for: Sequence-controlled multi-block copolymerization of acrylamides via aqueous SET-LRP at 0 °C
Source: Royal Society of Chemistry journal article supplement (doi:10.1039/c4py01066c), 2014-09-29
Supplement: c4py01066c1.pdf [file c4py01066c1.pdf]

# Sequence-controlled multi-block copolymerization of acrylamides *via* aqueous SET-LRP at 0 °C

Fehaid Alsubaie,<sup>a</sup> Athina Anastasaki,<sup>a</sup> Paul Wilson<sup>a,b</sup> and David M. Haddleton<sup>a,b\*</sup>

<sup>a</sup> Department of Chemistry, University of Warwick, Coventry, UK

<sup>b</sup> Monash Institute of Pharmaceutical Sciences, Monash University, Parkville, Australia.

## Materials

*N*-Isopropylacrylamide (NIPAM, 97%) was purchased from commercial supplier (Sigma-Aldrich) and was purified by recrystallization from hexane to remove the inhibitor. 2-Hydroxyethyl acrylamide (HEAA, 97%, Sigma-Aldrich), *N,N*-Dimethyl acrylamide (DMA, 99%, Sigma-Aldrich), *N,N*-Diethylacrylamide (DEA, 99%, Sigma-Aldrich) and 4-acryloylmorpholine (NAM, 97%, Sigma-Aldrich) were passed over a column filled with basic alumina to remove the inhibitor prior to use.

HPLC grade water (H<sub>2</sub>O, VWR international, LLC) was used as the solvent for disproportionation and polymerizations.

The water soluble initiator 2, 3-dihydroxypropyl 2-bromo-2-methylpropanoate was prepared as reported in the literature.<sup>1</sup>

*Tris*(2-(dimethylamino)ethyl)amine (Me<sub>6</sub>TREN) was synthesized according to literature procedures and stored under nitrogen prior to use.<sup>2,3</sup>

Copper(I) bromide (CuBr, 98%, Sigma-Aldrich) was sequentially washed with acetic acid and ethanol and dried under vacuum.<sup>4</sup>

## Instruments and analysis

Proton Nuclear Magnetic Resonance (<sup>1</sup>H NMR) spectra were recorded on Bruker DPX-300 and DPX-400 spectrometers using deuterated solvents obtained from Aldrich. Monomer conversion for NIPAM, HEAA, DMA, DEA and NAM homopolymerization was determined, comparing the integral of vinyl protons with isopropyl, ethyl, dimethyl, diethyl, morpholine protons, respectively.

Size-exclusion chromatography (SEC) was conducted on Varian 390-LC system using DMF as the mobile phase (5 mM  $\text{NH}_4\text{BF}_4$ ) at 50 °C, equipped with refractive index, UV and viscometry detectors, 2 × PLgel 5 mm mixed-D columns (300 × 7.5 mm), 1 × PLgel 5 mm guard column (50 × 7.5 mm) and autosampler. Commercial narrow linear poly (methyl methacrylate) standards in range of 200 to  $1.0 \times 10^6 \text{ g} \cdot \text{mol}^{-1}$  were used to calibrate the system. All samples were passed through 0.45  $\mu\text{m}$  PTFE filter before analysis.

All reactions were carried out under an inert atmosphere of oxygen-free nitrogen, using standard Schlenk techniques.

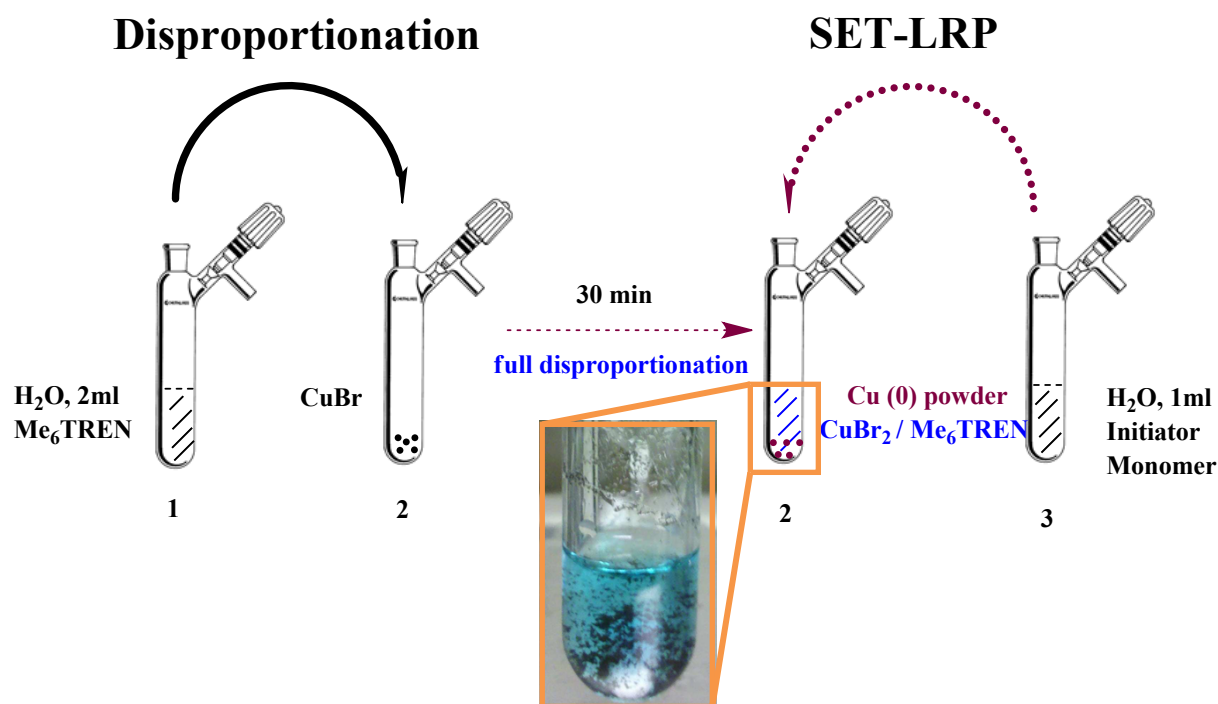

**Scheme S1:** Schematic of a typical aqueous SET-LRP proceeding with disproportionation of  $\text{CuBr}/\text{Me}_6\text{TREN}$  prior to monomer/initiator addition in pure water at 0 °C.

### General procedure for homopolymerization by aqueous SET-LRP ( $\text{DP}_n = 10$ )

To a Schlenk tube fitted with a magnetic stir bar and a rubber septum,  $\text{H}_2\text{O}$  (2 mL) and  $\text{Me}_6\text{TREN}$  (0.1 mmol) were charged and the mixture was bubbled with nitrogen for 15 min.  $\text{CuBr}$  (0.1 mmol) was then carefully added under slight positive pressure of nitrogen. The mixture immediately became blue ( $\text{Cu}^{\text{II}}$ ) and a purple/red precipitate ( $\text{Cu}^0$ ) was observed. In a separate vial fitted with a magnetic stir bar and a rubber septum monomer (2.5 mmol) was dissolved in  $\text{H}_2\text{O}$  (1.0 mL) prior to addition of initiator (2,3-dihydroxypropyl 2-bromo-2-methylpropanoate, 0.25 mmol) and the resulting mixture was bubbled with nitrogen for 15 min.

The degassed monomer / initiator aqueous solution was then transferred *via* cannula to the Schlenk tube containing Cu(0) / CuBr<sub>2</sub> / Me<sub>6</sub>-Tren catalyst. The Schlenk tube was sealed and the mixed solution was allowed to polymerize at 0 °C. Sample of the reaction mixture were then removed for analysis. The sample for <sup>1</sup>H NMR was directly diluted with D<sub>2</sub>O. Catalyst residues were removed by filtering through a column of neutral alumina prior to DMF SEC analysis.

### **General procedure for homopolymerization by aqueous SET-LRP (DP<sub>n</sub> = 100)**

To a Schlenk tube fitted with a magnetic stir bar and a rubber septum, H<sub>2</sub>O (2 mL) and Me<sub>6</sub>TREN (28 μmol) were charged and the mixture was bubbled with nitrogen for 15 min. CuBr (56 μmol) was then carefully added under slight positive pressure of nitrogen. The mixture immediately became blue (Cu<sup>II</sup>) and a purple/red precipitate (Cu<sup>0</sup>) was observed. In a separate vial fitted with a magnetic stir bar and a rubber septum monomer (7.0 mmol) was dissolved in H<sub>2</sub>O (4.0 mL) prior to addition of initiator (2,3-dihydroxypropyl 2-bromo-2-methylpropanoate, 0.07 mmol) and the resulting mixture was bubbled with nitrogen for 15 min. The degassed monomer / initiator aqueous solution was then transferred *via* cannula to the Schlenk tube containing Cu (0) / CuBr<sub>2</sub> / Me<sub>6</sub>TREN catalyst. The Schlenk tube was sealed and the mixed solution was allowed to polymerize at 0 °C. Samples of the reaction mixture were then removed for analysis. The sample for <sup>1</sup>H NMR was directly diluted with D<sub>2</sub>O. Catalyst residues were removed by filtering through a column of neutral alumina prior to DMF SEC analysis.

### **General procedure for kinetic investigation of aqueous SET-LRP polymerization**

Reactions were performed in triplicate. The general procedure for homopolymerization by aqueous SET-LRP was followed. Homopolymer conversions were monitored by regular sampling to accurately determine the time at which full monomer conversion was reached according to <sup>1</sup>H NMR (D<sub>2</sub>O). In subsequent experiments (also performed in triplicate) homopolymerization was allowed to proceed to this time and a sample was taken, in order to confirm the anticipated full conversion, *prior* to addition of freshly deoxygenated aqueous solutions of monomer (DP<sub>n</sub> eq). Regular sampling was again employed to identify the time required to reach full monomer conversion. This was repeated until conversion and/or molecular weight distributions were compromised by termination. Samples taken for <sup>1</sup>H NMR were directly diluted with D<sub>2</sub>O. Catalyst residues were removed by filtering through a column of neutral alumina prior to DMF SEC analysis.

## General procedure for chain extension/multi-block copolymerization by aqueous SET-LRP

The general procedure for homopolymerization by aqueous SET-LRP was followed. At specific times determined by control experiments a sample was taken for conversion analysis before addition of freshly deoxygenated aqueous solutions of monomer ( $DP_n$  eq). This process was repeated until conversion and/or molecular weight distributions were compromised by termination. Samples taken for  $^1\text{H}$  NMR were directly diluted with  $\text{D}_2\text{O}$ . Catalyst residues were removed by filtering through a column of neutral alumina prior to DMF SEC analysis.

### Supplementary tables and figures

**Table S1:** Preparation of multi-block homopolymers prepared by sequential addition of deoxygenated aliquots of aqueous NIPAM (10 eq) to PNIPAM during SET-LRP at 0 °C in  $\text{H}_2\text{O}$ .  $[\text{M}]_0 : [\text{I}]_0 : [\text{CuBr}] : [\text{Me}_6\text{TREN}] = [10] : [1] : [0.04] : [0.04]$ .

| Entry | Block number | Conv. (%) | Time per block (min) <sup>a</sup> | $M_{n,\text{th}}$ g.mol <sup>-1</sup> | $M_{n,\text{SEC}}^b$ g.mol <sup>-1</sup> | $\bar{D}$ |
|-------|--------------|-----------|-----------------------------------|---------------------------------------|------------------------------------------|-----------|
| 1     | Block 1      | 100       | 60 (60)                           | 1400                                  | 2900                                     | 1.06      |
| 2     | Block 2      | 100       | 240 (300)                         | 2500                                  | 4800                                     | 1.07      |
| 3     | Block 3      | 100       | 320 (620)                         | 3600                                  | 6700                                     | 1.08      |
| 4     | Block 4      | 0         | 1200 (1820)                       | 4700                                  | 6900                                     | 1.08      |

<sup>a</sup> Cumulative time in parentheses. <sup>b</sup> DMF SEC, calibrating with PMMA standard.

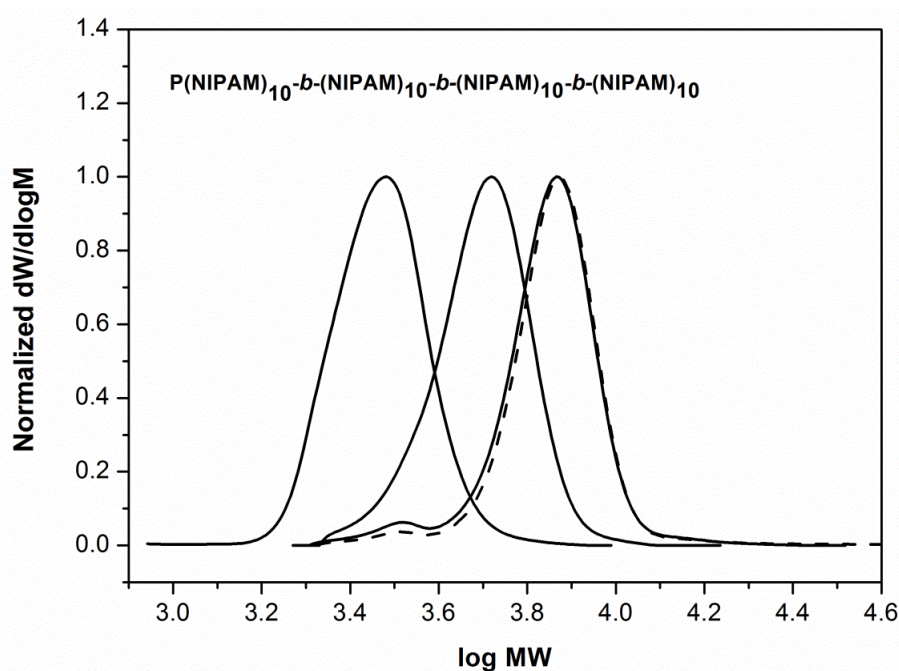

**Figure S1:** Preparation of multi-block homopolymers (unoptimized) prepared by sequential addition of deoxygenated aliquots of aqueous NIPAM (10 eq) to PNIPAM via SET-LRP at 0 °C in D<sub>2</sub>O (a) and evolution of block molecular weight by DMF SEC (b) [M]<sub>0</sub> : [I]<sub>0</sub> : [CuBr] : [Me<sub>6</sub>TREN] = [10] : [1] : [0.04] : [0.04].

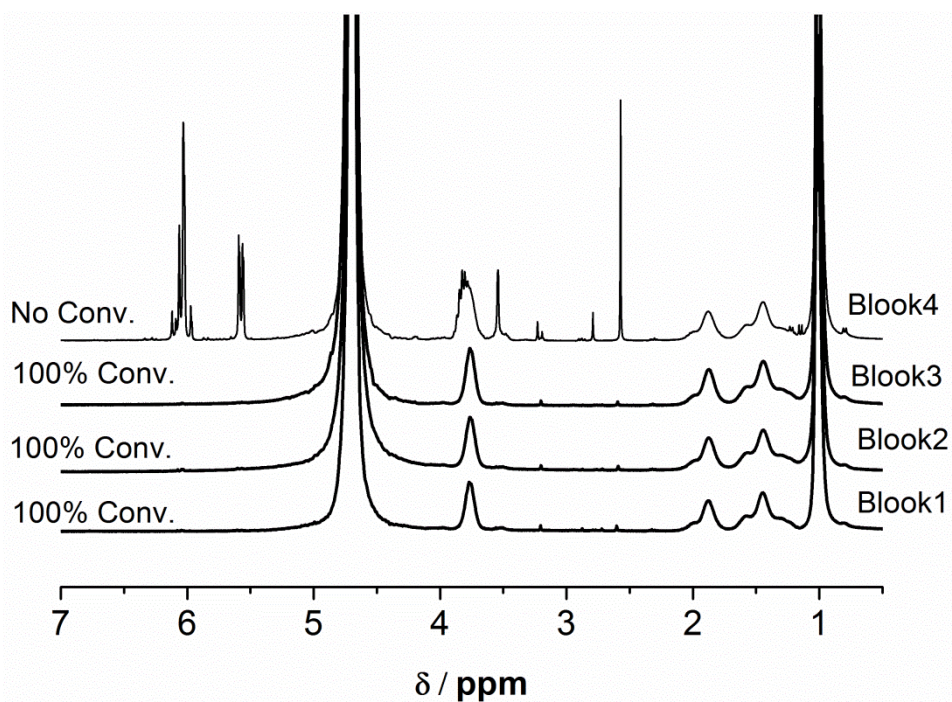

**Figure S2:** <sup>1</sup>H NMR (D<sub>2</sub>O) show the conversion during multi-block homopolymerization (unoptimized) of NIPAM. [M]<sub>0</sub> : [I]<sub>0</sub> : [CuBr] : [Me<sub>6</sub>-Tren] = [10] : [1] : [0.04] : [0.04].

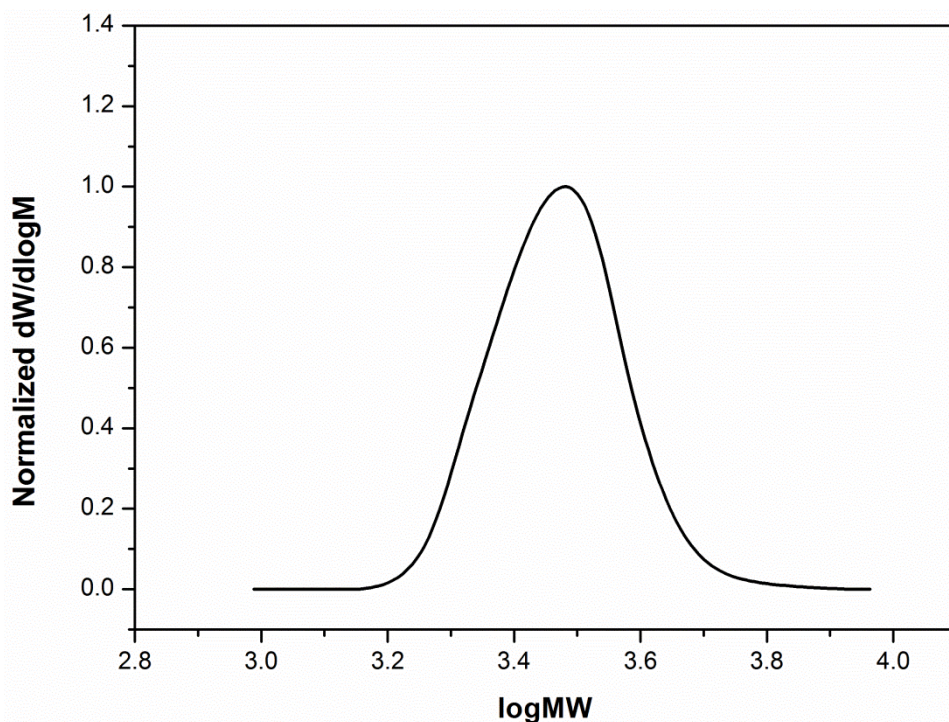

**Figure S3:** DMF SEC for the homopolymerization of NIPAM by aqueous SET-LRP [NIPAM] : [I] : [CuBr] : [Me<sub>6</sub>-Tren] = [10] : [1] : [0.04] : [0.04].

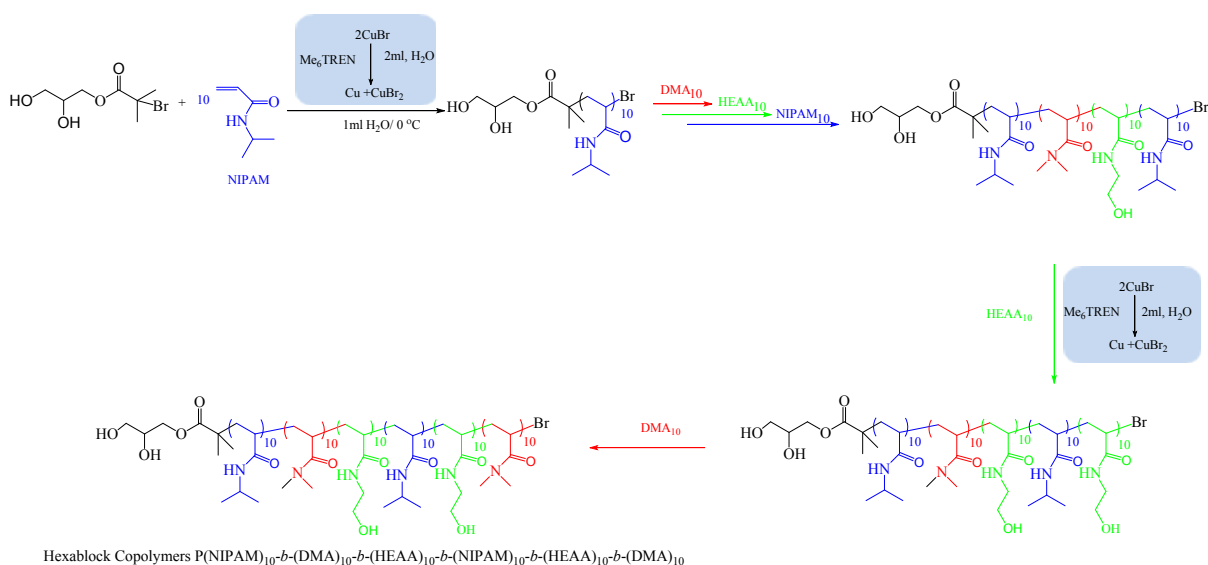

**Scheme S2:** Synthesis of multi-block copolymers composed of NIPAM, DMA and HEAA by iterative SET-LRP in H<sub>2</sub>O with an additional feed of catalyst with the 5<sup>th</sup> monomer addition. [M]<sub>0</sub> : [I]<sub>0</sub> : [CuBr] : [Me<sub>6</sub>-Tren] = [10] : [1] : [0.04] : [0.04].

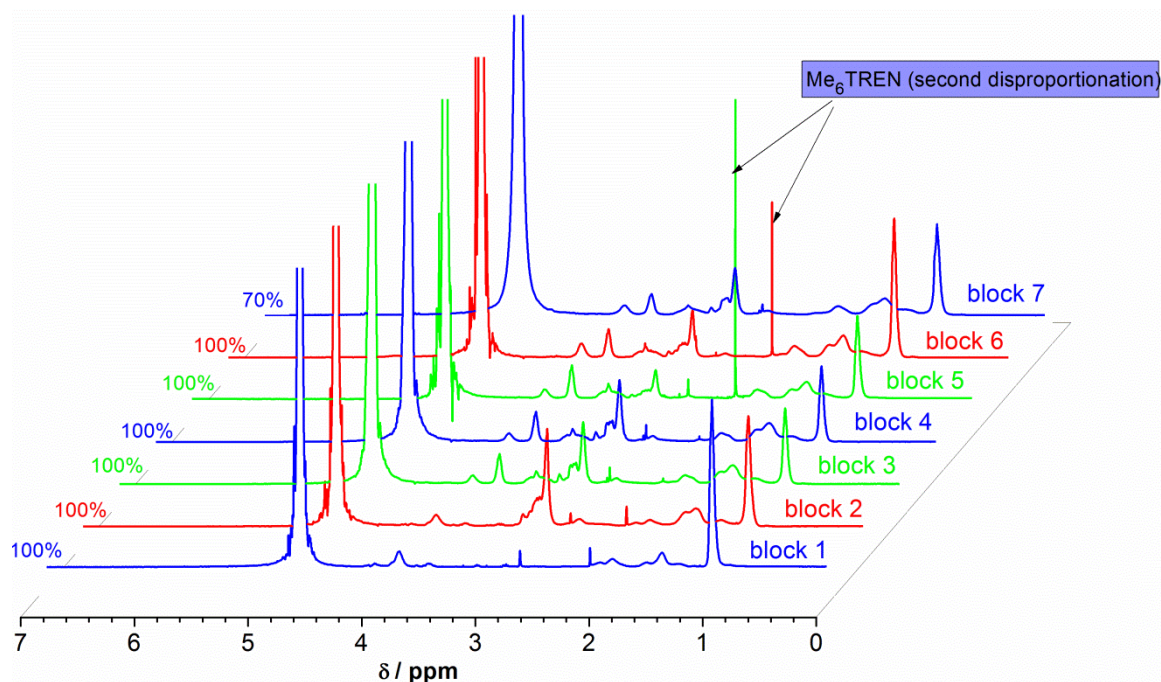

**Figure S4:**  $^1\text{H}$ NMR ( $\text{D}_2\text{O}$ ) of multi-block copolymers composed of NIPAM, DMA and HEAA by iterative SET-LRP in  $\text{H}_2\text{O}$  with an additional feed of catalyst with the 5<sup>th</sup> monomer addition.  $[\text{M}]_0 : [\text{I}]_0 : [\text{CuBr}] : [\text{Me}_6\text{-Tren}] = [10] : [1] : [0.04] : [0.04]$ .

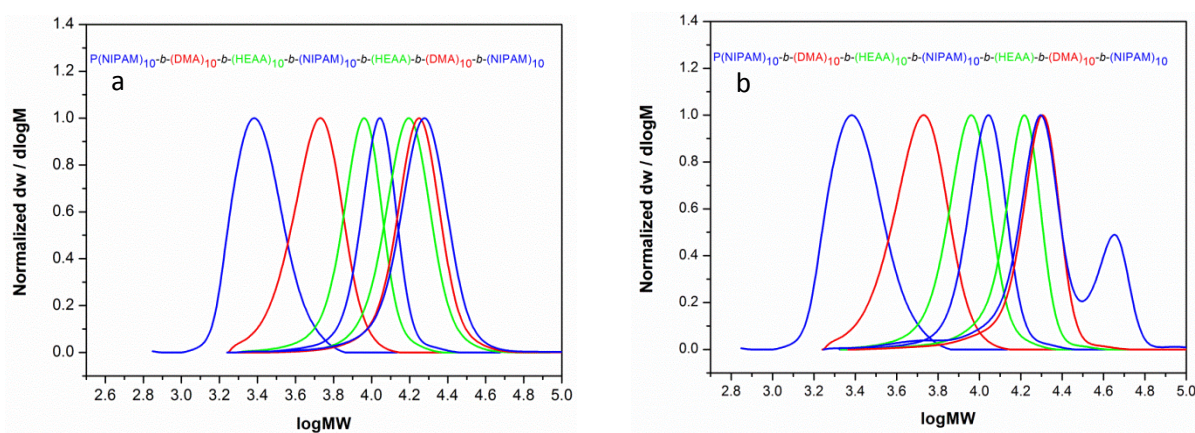

**Figure S5.** DMF SEC for multiblock copolymers composed of NIPAM, HEAA and DMA (a) and NIPAM, HEAA and DMA with an addition feed of catalyst (b) in  $\text{H}_2\text{O}$  at  $0^\circ\text{C}$ .  $[\text{M}]_0 : [\text{I}]_0 : [\text{CuBr}] : [\text{Me}_6\text{TREN}] = [10] : [1] : [0.04] : [0.04]$ .

**Table S2:** Preparation of multi-block copolymers composed of NIPAM, DMA and HEAA by iterative SET-LRP in H<sub>2</sub>O with an additional feed of catalyst with the 5<sup>th</sup> monomer addition. [M]<sub>0</sub> : [I]<sub>0</sub> : [CuBr] : [Me<sub>6</sub>TREN] = [10] : [1] : [0.04] : [0.04].

| Entry | Block number | Conv. (%) | Monomer | Time per block (min) <sup>a</sup> | $M_{n,th}$ g.mol <sup>-1</sup> | $M_{n,SEC}^b$ g.mol <sup>-1</sup> | $\mathcal{D}^b$ |
|-------|--------------|-----------|---------|-----------------------------------|--------------------------------|-----------------------------------|-----------------|
| 1     | Block 1      | 100       | NIPAM   | 11 (11)                           | 1400                           | 2700                              | 1.09            |
| 2     | Block 2      | 100       | DMA     | 6 (17)                            | 2400                           | 4800                              | 1.11            |
| 3     | Block 3      | 100       | HEAA    | 25 (42)                           | 3500                           | 8300                              | 1.09            |
| 4     | Block 4      | 100       | NIPAM   | 40 (82)                           | 4600                           | 10200                             | 1.07            |
| 5     | Block 5      | 100       | HEAA    | 45 (127)                          | 5800                           | 14500                             | 1.09            |
| 6     | Block 6      | 100       | DMA     | 70 (197)                          | 6800                           | 17400                             | 1.11            |
| 7     | Block 7      | 70        | NIPAM   | overnight                         | 7900                           | 18700                             | 1.37            |

<sup>a</sup> Cumulative time in parentheses. <sup>b</sup> DMF SEC, , calibrating with PMMA standard

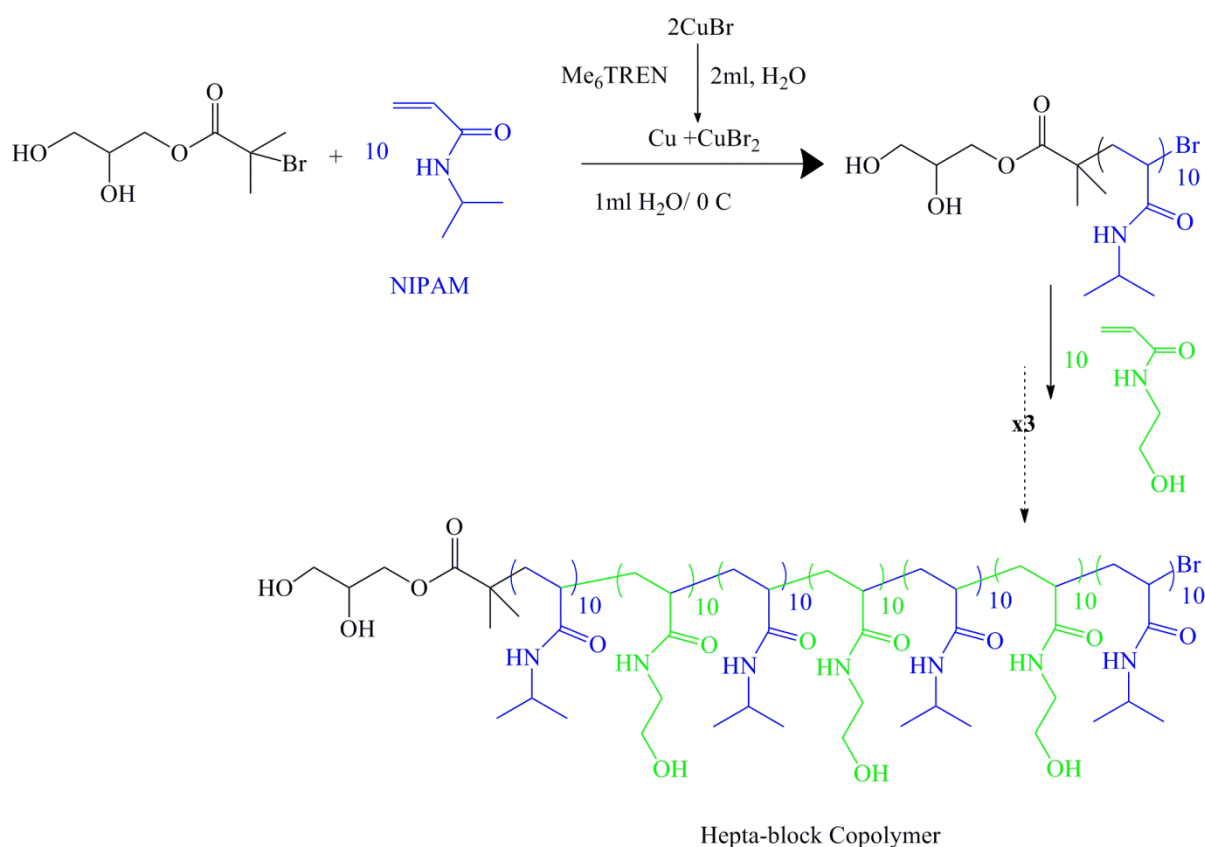

**Scheme S3:** Synthesis of alternating block copolymers composed of NIPAM and HEAA by iterative SET-LRP in H<sub>2</sub>O. [M]<sub>0</sub> : [I]<sub>0</sub> : [CuBr] : [Me<sub>6</sub>TREN] = [10] : [1] : [0.04] : [0.04].



**Table S3:** Preparation of alternating block copolymers composed of NIPAM and HEAA by iterative SET-LRP in H<sub>2</sub>O. [M]<sub>0</sub> : [I]<sub>0</sub> : [CuBr] : [Me<sub>6</sub>TREN] = [10] : [1] : [0.04] : [0.04].

| Entry | Block number | Monomer | Conv. (%) | Time per block (min) <sup>a</sup> | <i>M</i> <sub>n,th</sub> g.mol <sup>-1</sup> | <i>M</i> <sub>n,SEC</sub> <sup>b</sup> g.mol <sup>-1</sup> | <i>D</i> <sup>b</sup> |
|-------|--------------|---------|-----------|-----------------------------------|----------------------------------------------|------------------------------------------------------------|-----------------------|
| 1     | Block 1      | NIPAM   | 100       | 11 (11)                           | 1400                                         | 2600                                                       | 1.05                  |
| 2     | Block 2      | HEAA    | 99        | 25 (36)                           | 2600                                         | 5100                                                       | 1.10                  |
| 3     | Block 3      | NIPAM   | 100       | 20 (56)                           | 3800                                         | 7100                                                       | 1.09                  |
| 4     | Block 4      | HEAA    | 98        | 24 (80)                           | 5000                                         | 9900                                                       | 1.10                  |
| 5     | Block 5      | NIPAM   | 100       | 30 (110)                          | 6200                                         | 12200                                                      | 1.08                  |
| 6     | Block 6      | HEAA    | 98        | 50 (160)                          | 7400                                         | 15600                                                      | 1.10                  |
| 7     | Block 7      | NIPAM   | 100       | 60 (240)                          | 8600                                         | 18800                                                      | 1.07                  |

<sup>a</sup> Cumulative time in parentheses. <sup>b</sup> DMF SEC, calibrating with PMMA standard

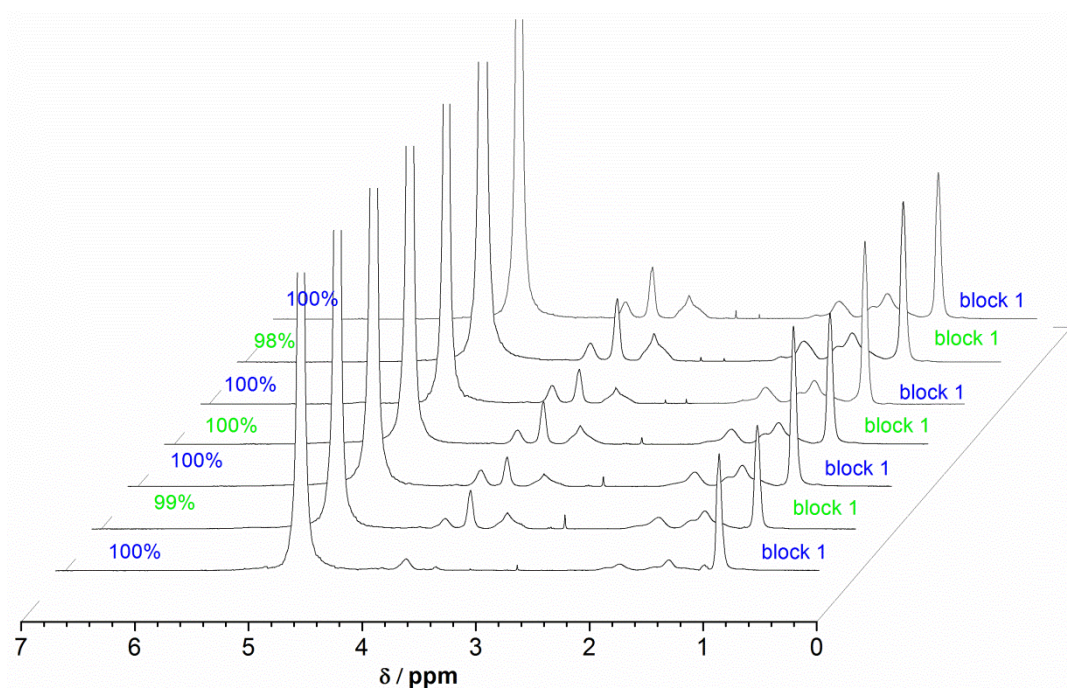

**Figure S6:** <sup>1</sup>H NMR (D<sub>2</sub>O) showing the conversions for alternating block copolymers composed of NIPAM and HEAA by iterative SET-LRP in H<sub>2</sub>O. [M]<sub>0</sub> : [I]<sub>0</sub> : [CuBr] : [Me<sub>6</sub>TREN] = [10] : [1] : [0.04] : [0.04].

**Table S4:** Preparation of alternating block copolymers composed of NIPAM and DMA by iterative SET-LRP in H<sub>2</sub>O. [M]<sub>0</sub> : [I]<sub>0</sub> : [CuBr] : [Me<sub>6</sub>TREN] = [10] : [1] : [0.04] : [0.04].

| Entry | Block number | Monomer | Conv. (%) | Time per block (min) <sup>a</sup> | $M_{n,th}$ g.mol <sup>-1</sup> | $M_{n,SEC}^b$ g.mol <sup>-1</sup> | $\mathcal{D}^b$ |
|-------|--------------|---------|-----------|-----------------------------------|--------------------------------|-----------------------------------|-----------------|
| 1     | Block 1      | NIPAM   | 100       | 11 (11)                           | 1400                           | 2600                              | 1.06            |
| 2     | Block 2      | DMA     | 100       | 6 (17)                            | 2400                           | 5200                              | 1.09            |
| 3     | Block 3      | NIPAM   | 99        | 20 (37)                           | 3500                           | 7600                              | 1.07            |
| 4     | Block 4      | DMA     | 99        | 15 (52)                           | 4500                           | 10900                             | 1.10            |
| 5     | Block 5      | NIPAM   | 99        | 40 (92)                           | 5600                           | 13400                             | 1.12            |
| 6     | Block 6      | DMA     | 90        | 180 (272)                         | 6600                           | 15400                             | 1.22            |
| 7     | Block 7      | NIPAM   | 0         | 180 (452)                         | 7700                           | 16300                             | 1.21            |

<sup>a</sup> Cumulative time in parentheses. <sup>b</sup> DMF SEC, calibrating with PMMA standard

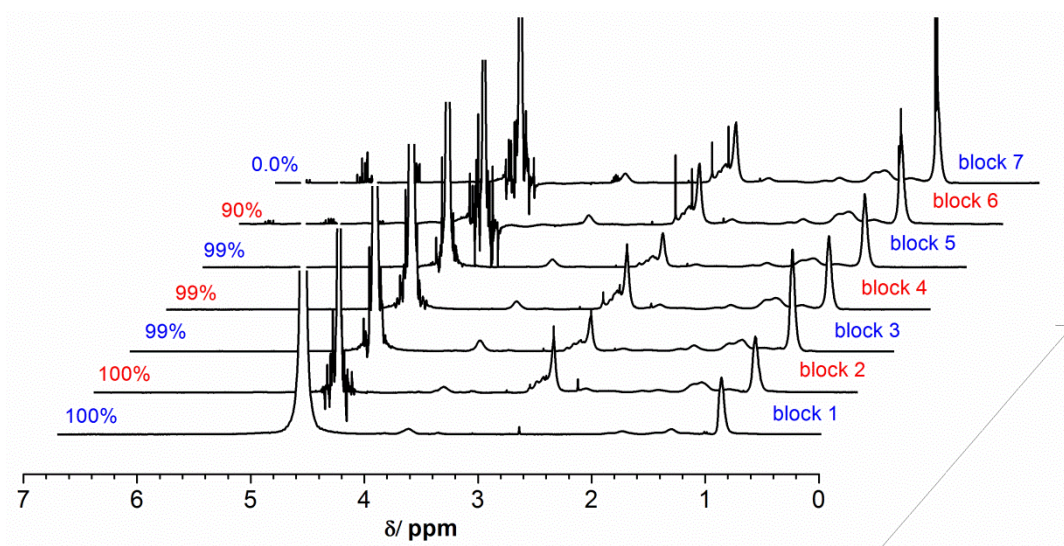

**Figure S7:** <sup>1</sup>H NMR (D<sub>2</sub>O) showing the conversions for alternating block copolymers composed of NIPAM and DMA by iterative SET-LRP in H<sub>2</sub>O. [M]<sub>0</sub> : [I]<sub>0</sub> : [CuBr] : [Me<sub>6</sub>TREN] = [10] : [1] : [0.04] : [0.04].

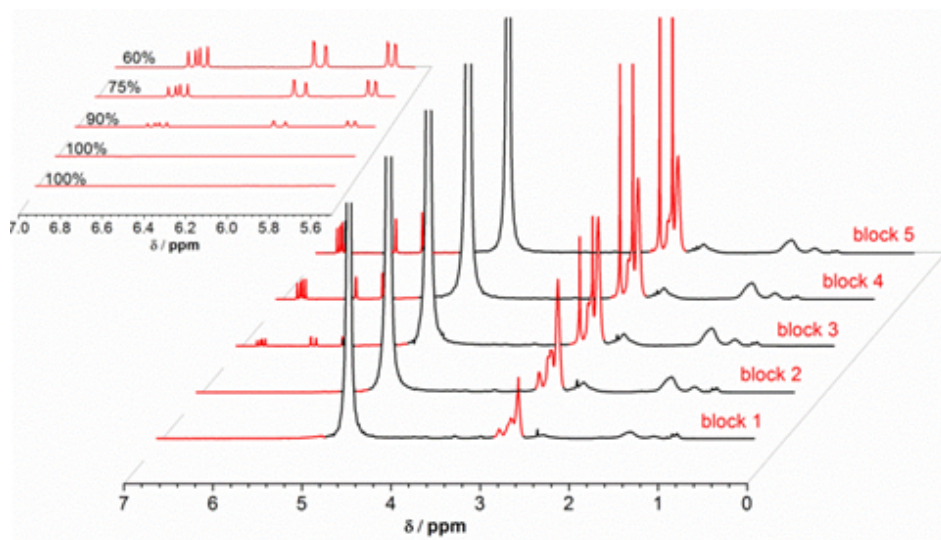

**Figure S8.**  $^1\text{H}$  NMR analyses for aqueous SET-LRP of multi-block homopolymers of DMA (a, b).  $[\text{M}]_0 : [\text{I}]_0 : [\text{CuBr}] : [\text{Me}_6\text{TREN}] = [10] : [1] : [0.04] : [0.04]$ .

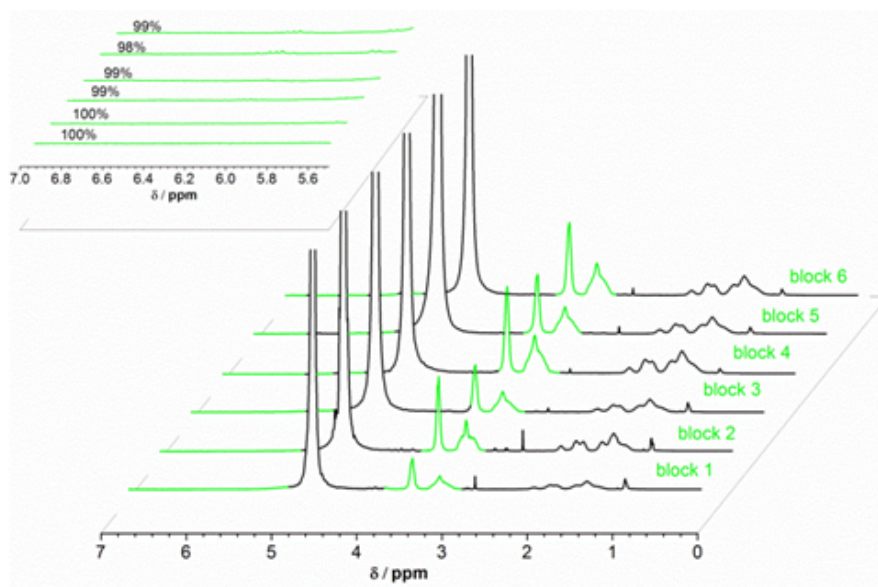

**Figure S9.**  $^1\text{H}$  NMR analyses for aqueous SET-LRP of multi-block homopolymers of HEAA.  $[\text{M}]_0 : [\text{I}]_0 : [\text{CuBr}] : [\text{Me}_6\text{TREN}] = [10] : [1] : [0.04] : [0.04]$ .

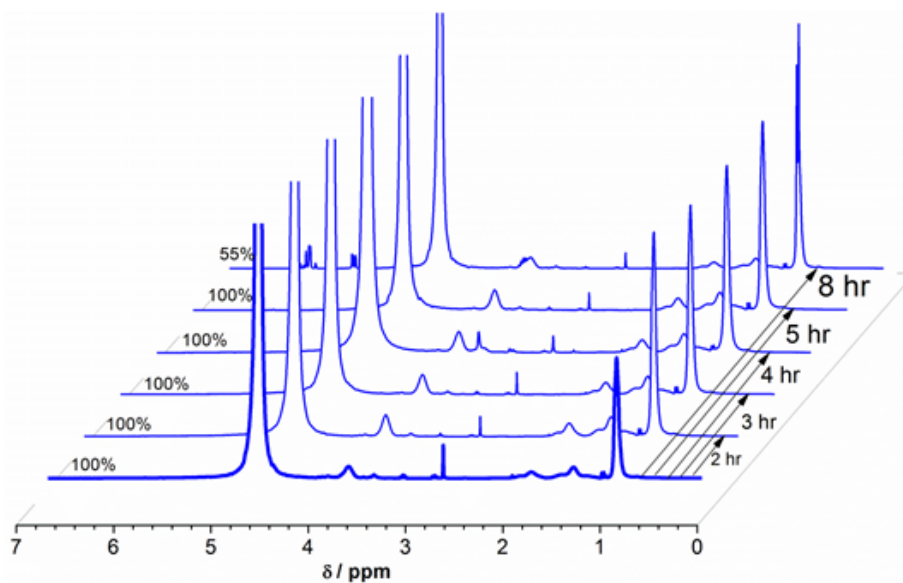

**Figure S10.** Assessment of the chain end fidelity of PNIPAM by in situ chain extension using deoxygenated NIPAM (10 eq).  $^1\text{H}$  NMR following chain extension at delayed feed times.  $[\text{M}]_0 : [\text{I}]_0 : [\text{CuBr}] : [\text{Me}_6\text{TREN}] = [10] : [1] : [0.04] : [0.04]$ .

**Table S5:** Preparation of multi-block homopolymers prepared by sequential addition of deoxygenated aliquots of aqueous HEAA (10 eq) to PHEAA during SET-LRP at  $0^\circ\text{C}$  in  $\text{H}_2\text{O}$ .  $[\text{M}]_0 : [\text{I}]_0 : [\text{CuBr}] : [\text{Me}_6\text{TREN}] = [10] : [1] : [0.04] : [0.04]$ .

| Entry | Monomer | Conv. (%) | Time per block (min) <sup>a</sup> | $M_{n,\text{th}}$ g.mol <sup>-1</sup> | $M_{n,\text{SEC}}^b$ g.mol <sup>-1</sup> | $D^b$ |
|-------|---------|-----------|-----------------------------------|---------------------------------------|------------------------------------------|-------|
| 1     | HEAA    | 100       | 25 (25)                           | 1400                                  | 4500                                     | 1.08  |
| 2     | HEAA    | 100       | 20 (45)                           | 2500                                  | 7200                                     | 1.09  |
| 3     | HEAA    | 99        | 20 (65)                           | 3700                                  | 10700                                    | 1.06  |
| 4     | HEAA    | 99        | 20 (85)                           | 4800                                  | 13700                                    | 1.05  |
| 5     | HEAA    | 98        | 70 (155)                          | 6000                                  | 16900                                    | 1.06  |
| 6     | HEAA    | 100       | 70 (225)                          | 7100                                  | 20900                                    | 1.07  |

<sup>a</sup> Cumulative time in parentheses. <sup>b</sup> DMF SEC, calibrating with PMMA standard.

**Table S6:** Preparation of multi-block homopolymers prepared by sequential addition of deoxygenated aliquots of aqueous DMA (10 eq) to PDMA during SET-LRP at 0 °C in H<sub>2</sub>O. [M]<sub>0</sub> : [I]<sub>0</sub> : [CuBr] : [Me<sub>6</sub>TREN] = [10] : [1] : [0.04] : [0.04].

| Entry | Monomer | Conv. (%) | Time per block (min) <sup>a</sup> | $M_{n,th}$ g.mol <sup>-1</sup> | $M_{n,SEC}^b$ g.mol <sup>-1</sup> | $\mathcal{D}^b$ |
|-------|---------|-----------|-----------------------------------|--------------------------------|-----------------------------------|-----------------|
| 1     | DMA     | 98        | 6 (6)                             | 1200                           | 3100                              | 1.08            |
| 2     | DMA     | 100       | 20 (26)                           | 2200                           | 5100                              | 1.10            |
| 3     | DMA     | 90        | 20 (46)                           | 3200                           | 8000                              | 1.17            |
| 4     | DMA     | 74        | 20 (66)                           | 4200                           | 90010                             | 1.25            |
| 5     | DMA     | 60        | 120 (186)                         | 5200                           | 10200                             | 1.30            |

<sup>a</sup> Cumulative time in parentheses. <sup>b</sup> DMF SEC, calibrating with PMMA standard.

**Table S7:** Investigating the effect of time of chain end fidelity of PNIPAM under aqueous SET-LRP conditions. [M]<sub>0</sub> : [I]<sub>0</sub> : [CuBr] : [Me<sub>6</sub>TREN] = [10] : [1] : [0.04] : [0.04].

| Reaction No. | Monomer | Conv. (%) | Time per block (hr) | $M_{n,th}$ g.mol <sup>-1</sup> | $M_{n,SEC}^a$ g.mol <sup>-1</sup> | $\mathcal{D}^a$ |
|--------------|---------|-----------|---------------------|--------------------------------|-----------------------------------|-----------------|
| 1            | NIPAM   | 100       | 2                   | 1400                           | 2600                              | 1.05            |
|              | NIPAM   | 100       | overnight           | 2500                           | 4500                              | 1.09            |
| 2            | NIPAM   | 100       | 3                   | 1400                           | 2600                              | 1.05            |
|              | NIPAM   | 100       | overnight           | 2500                           | 4300                              | 1.07            |
| 3            | NIPAM   | 100       | 4                   | 1400                           | 2600                              | 1.05            |
|              | NIPAM   | 100       | overnight           | 2500                           | 4200                              | 1.11            |
| 4            | NIPAM   | 100       | 5                   | 1400                           | 2600                              | 1.05            |
|              | NIPAM   | 100       | overnight           | 2500                           | 4600                              | 1.08            |
| 5            | NIPAM   | 100       | 8                   | 1400                           | 2600                              | 1.05            |
|              | NIPAM   | 50        | overnight           | 2500                           | 3500                              | 1.16            |

<sup>a</sup> DMF SEC, calibrating with PMMA standard.

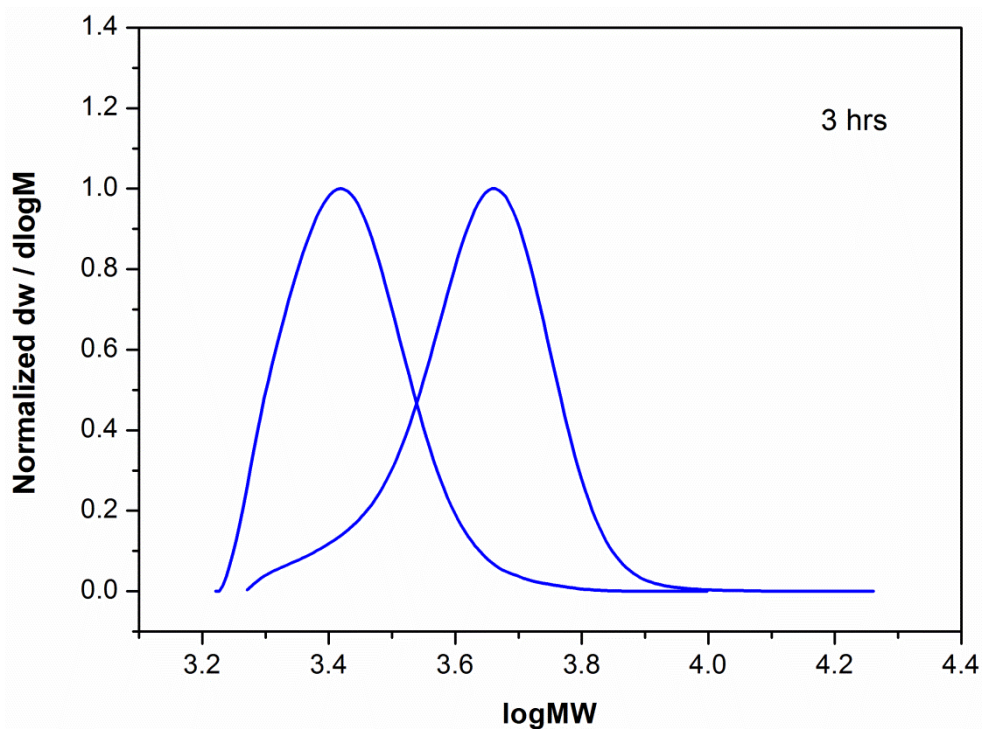

**Figure S11:** DMF SEC for the chain extension of PNIPAM with deoxygenated aqueous NIPAM (10 eq) after a 3 hour delay.  $[M]_0 : [I]_0 : [CuBr] : [Me_6TREN] = [10] : [1] : [0.04] : [0.04]$ .

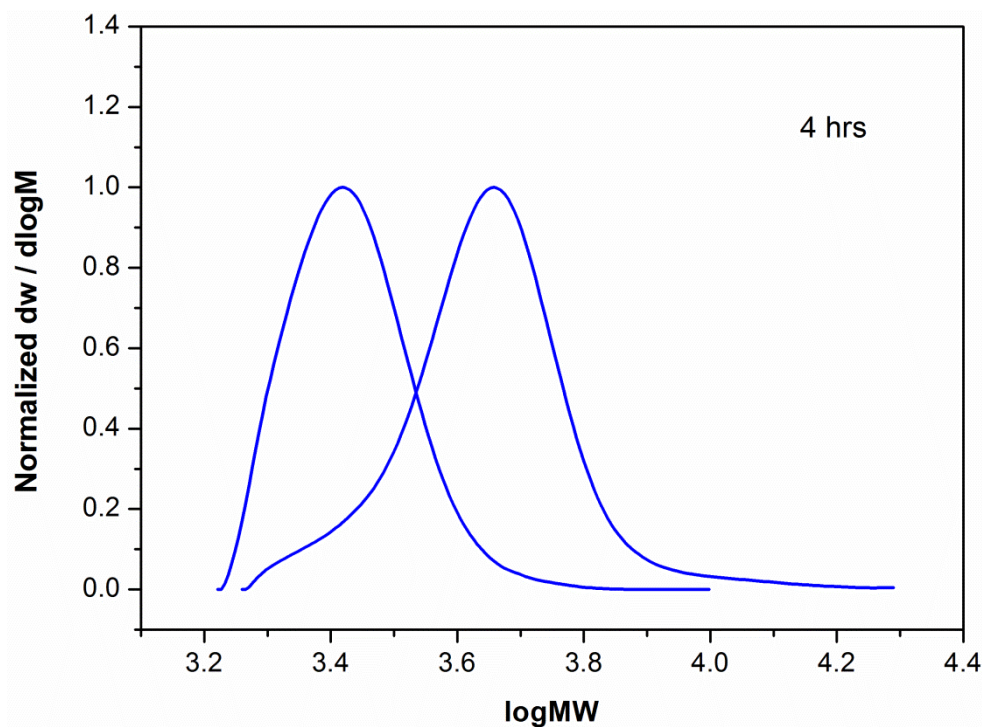

**Figure S12:** DMF SEC for the chain extension of PNIPAM with deoxygenated aqueous NIPAM (10 eq) after a 4 hour delay.  $[M]_0 : [I]_0 : [CuBr] : [Me_6TREN] = [10] : [1] : [0.04] : [0.04]$ .

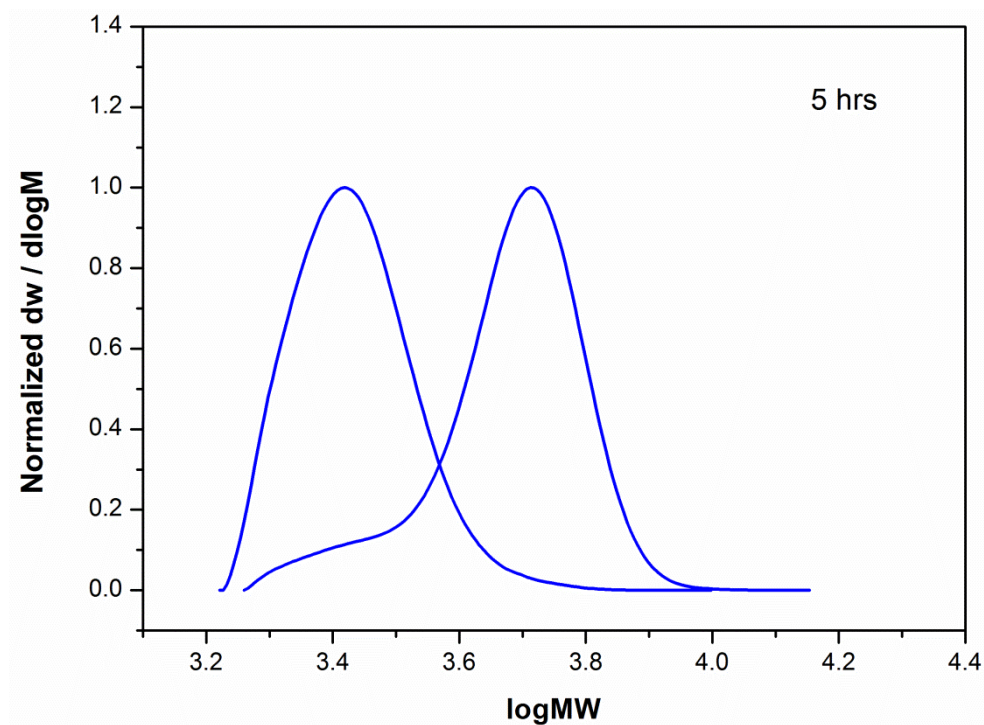

**Figure S13:** DMF SEC for the chain extension of PNIPAM with deoxygenated aqueous NIPAM (10 eq) after a 5 hour delay.  $[M]_0 : [I]_0 : [CuBr] : [Me_6TREN] = [10] : [1] : [0.04] : [0.04]$ .

**Table S8:** Investigating the effect of time of chain end fidelity of PHEAA under aqueous SET-LRP conditions.  $[M]_0 : [I]_0 : [CuBr] : [Me_6TREN] = [10] : [1] : [0.04] : [0.04]$ .

| Reaction No. | Monomer | Conv. (%) | Time per block (hr) | $M_{n,th}$ g.mol <sup>-1</sup> | $M_{n,SEC}^a$ g.mol <sup>-1</sup> | $\bar{D}^a$ |
|--------------|---------|-----------|---------------------|--------------------------------|-----------------------------------|-------------|
| 1            | HEAA    | 100       | 2                   | 1400                           | 3600                              | 1.07        |
|              | NIPAM   | 100       | overnight           | 2500                           | 5500                              | 1.07        |
| 2            | HEAA    | 100       | 3                   | 1400                           | 3600                              | 1.09        |
|              | NIPAM   | 100       | overnight           | 2500                           | 4900                              | 1.08        |
| 3            | HEAA    | 100       | 4                   | 1400                           | 3600                              | 1.07        |
|              | NIPAM   | 95        | overnight           | 2500                           | 5000                              | 1.07        |
| 4            | HEAA    | 100       | 5                   | 1400                           | 3600                              | 1.07        |
|              | NIPAM   | 75        | overnight           | 2500                           | 4400                              | 1.09        |

<sup>a</sup> DMF SEC, calibrating with PMMA standard.

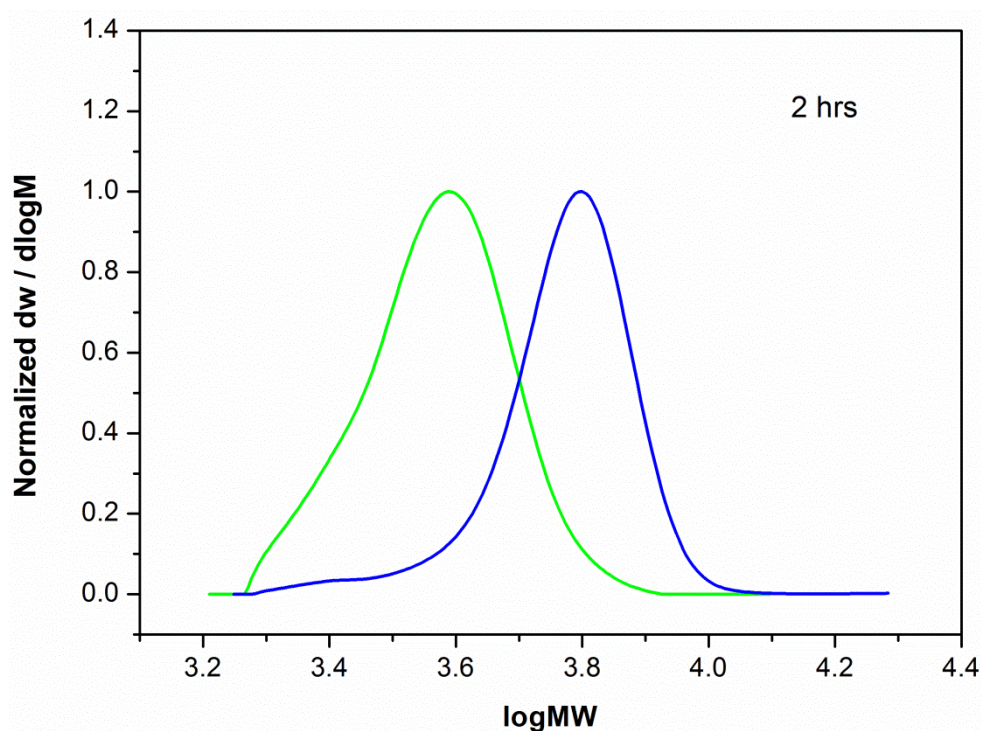

**Figure S14:** DMF SEC for the chain extension of PHEAA with deoxygenated aqueous NIPAM (10 eq) after a 2 hour delay.  $[M]_0 : [I]_0 : [CuBr] : [Me_6TREN] = [10] : [1] : [0.04] : [0.04]$ .



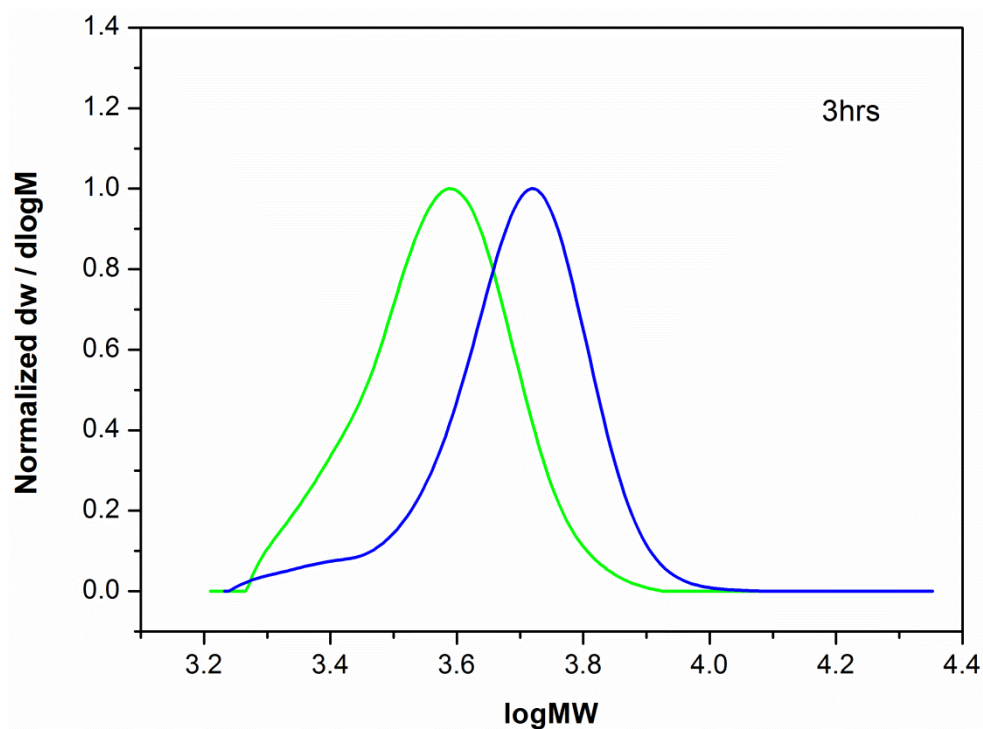

**Figure S15:** DMF SEC for the chain extension of PHEAA with deoxygenated aqueous NIPAM (10 eq) after a 3 hour delay.  $[M]_0 : [I]_0 : [CuBr] : [Me_6TREN] = [10] : [1] : [0.04] : [0.04]$ .

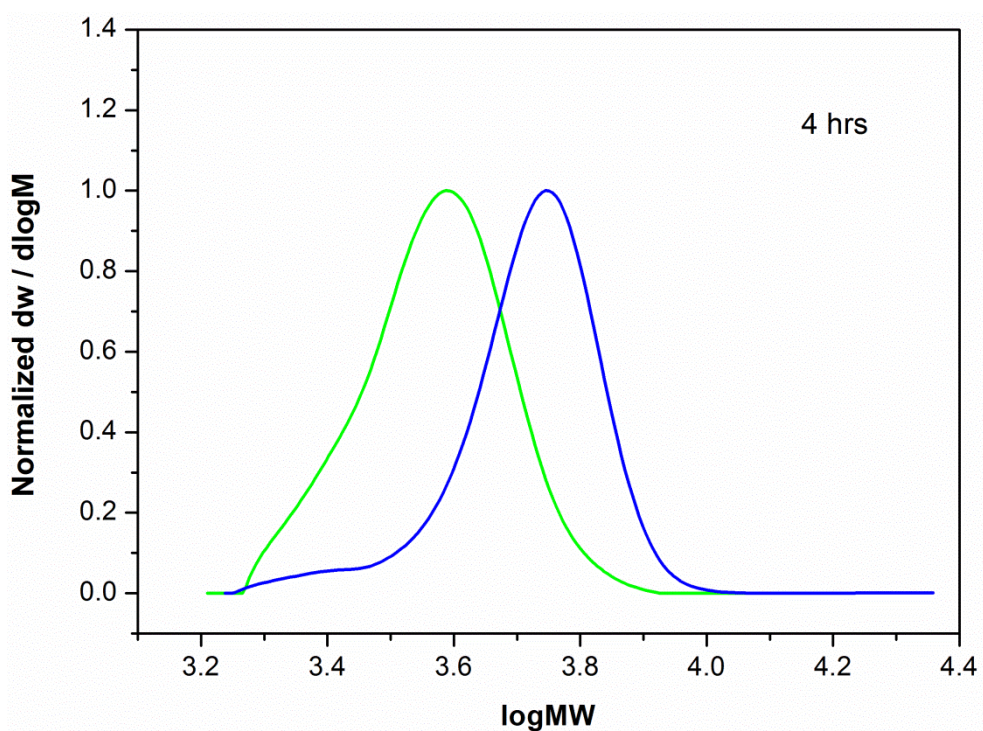

**Figure S16:** DMF SEC for the chain extension of PHEAA with deoxygenated aqueous NIPAM (10 eq) after a 4 hour delay.  $[M]_0 : [I]_0 : [CuBr] : [Me_6TREN] = [10] : [1] : [0.04] : [0.04]$ .

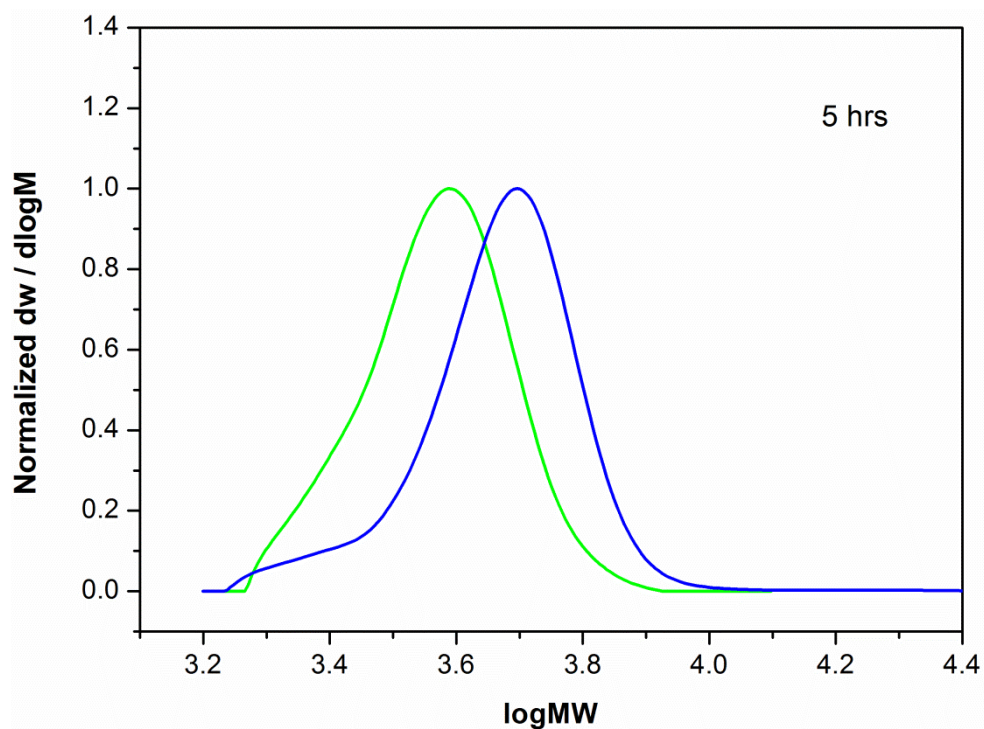

**Figure S17:** DMF SEC for the chain extension of PHEAA with deoxygenated aqueous NIPAM (10 eq) after a 5 hour delay.  $[M]_0 : [I]_0 : [CuBr] : [Me_6TREN] = [10] : [1] : [0.04] : [0.04]$ .

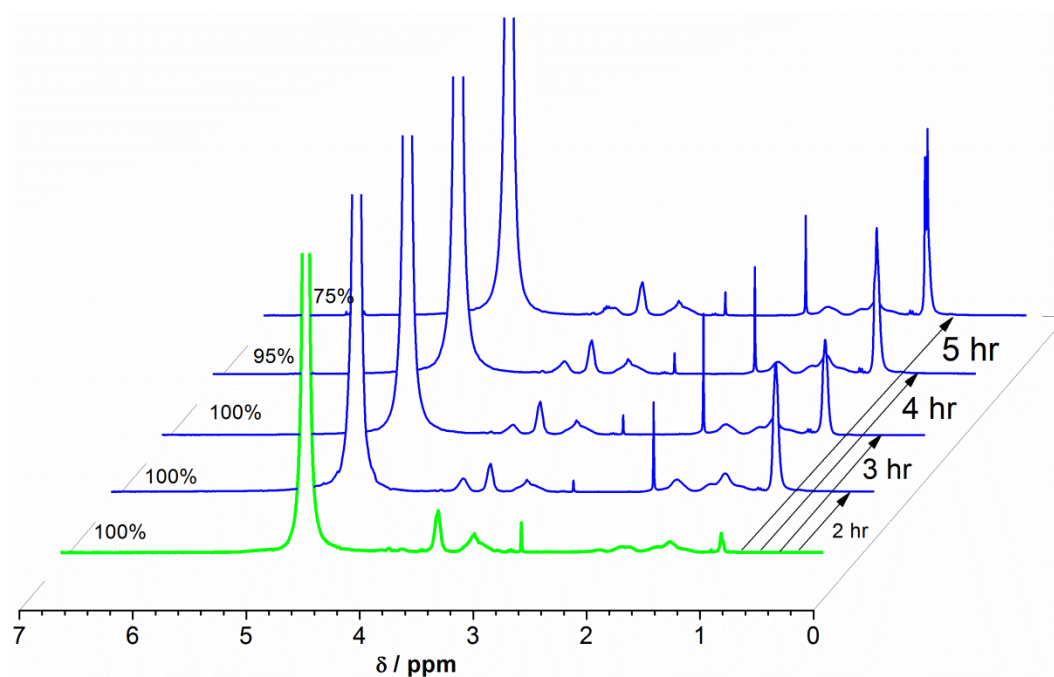

**Figure S18:**  $^1H$ NMR ( $D_2O$ ) for the chain extension of PHEAA with deoxygenated aqueous NIPAM (10 eq) after various time delays.

**Table S9:** Investigating the effect of time of chain end fidelity of PDMA under aqueous SET-LRP conditions.  $[M]_0 : [I]_0 : [CuBr] : [Me_6TREN] = [10] : [1] : [0.04] : [0.04]$ .

| Reaction No. | Monomer | Conv. (%) | Time per block (hr) | $M_{n,th}$ g.mol <sup>-1</sup> | $M_{n,SEC}^a$ g.mol <sup>-1</sup> | $\mathcal{D}^a$ |
|--------------|---------|-----------|---------------------|--------------------------------|-----------------------------------|-----------------|
| 1            | DMA     | 100       | 0.5                 | 1200                           | 2400                              | 1.04            |
|              | NIPAM   | 100       | overnight           | 2300                           | 4400                              | 1.10            |
| 2            | DMA     | 100       | 1                   | 1200                           | 2500                              | 1.07            |
|              | NIPAM   | 20        | overnight           | 2300                           | 3100                              | 1.11            |
| 3            | DMA     | 100       | 2                   | 1200                           | 2600                              | 1.07            |
|              | NIPAM   | 15        | overnight           | 2300                           | 2700                              | 1.08            |

<sup>a</sup> DMF SEC, calibrating with PMMA standard.

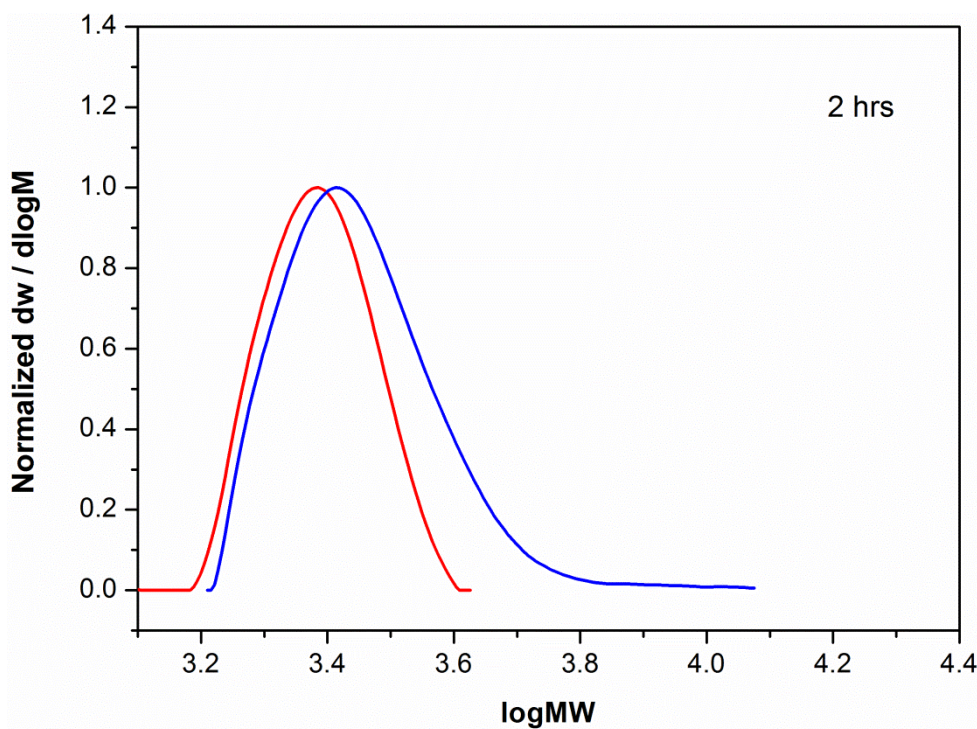

**Figure S19:** DMF SEC for the chain extension of PDMA with deoxygenated aqueous NIPAM (10 eq) after a 2 hour delay.  $[M]_0 : [I]_0 : [CuBr] : [Me_6TREN] = [10] : [1] : [0.04] : [0.04]$ .

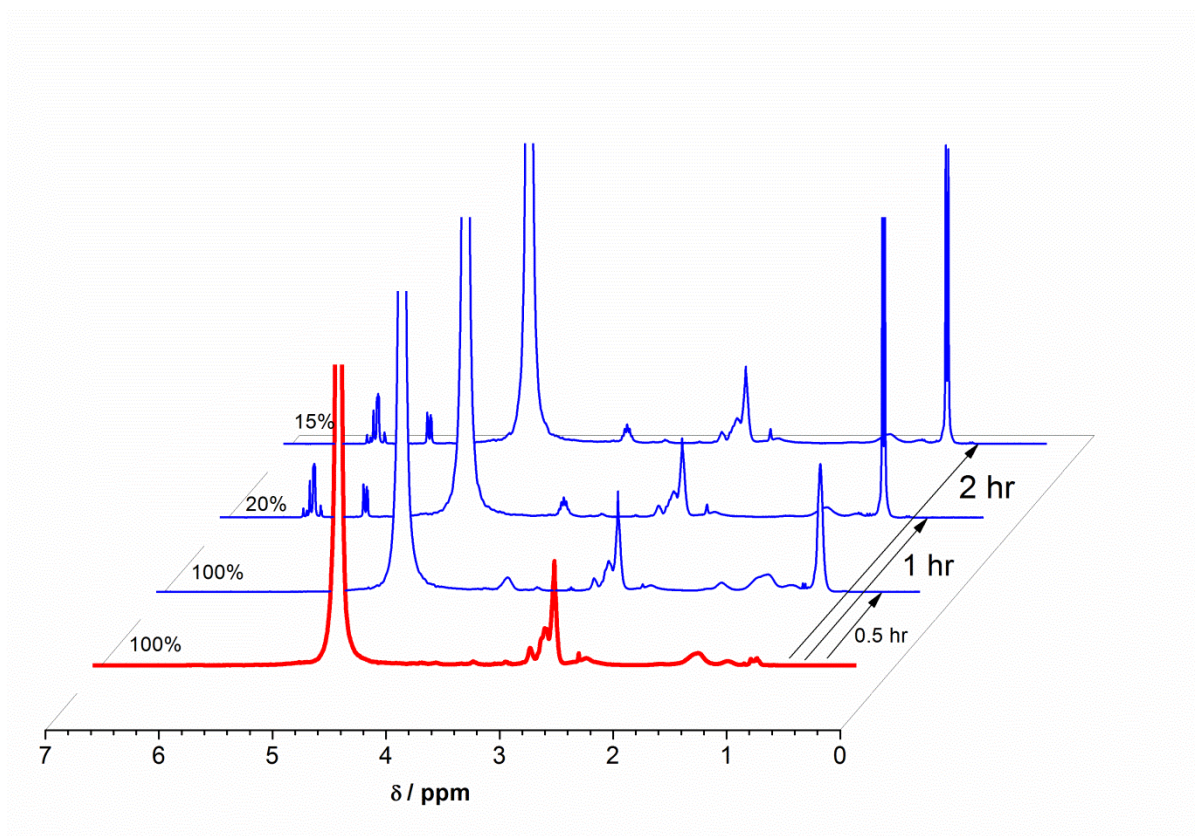

**Figure S20:** Assessment of the chain end fidelity of PDMA by in situ chain extension using deoxygenated NIPAM (10 eq).  $^1\text{H}$  NMR (c) following chain extension at delayed feed times.  $[\text{M}]_0 : [\text{I}]_0 : [\text{CuBr}] : [\text{Me}_6\text{TREN}] = [10] : [1] : [0.04] : [0.04]$ .

**Table S10:** Investigating the effect of time of chain end fidelity of PNAM under aqueous SET-LRP conditions.  $[\text{M}]_0 : [\text{I}]_0 : [\text{CuBr}] : [\text{Me}_6\text{TREN}] = [10] : [1] : [0.04] : [0.04]$ .

| Reaction No. | Monomer | Conv. (%) | Time per block (hr) | $M_{n,\text{th}}$ $\text{g.mol}^{-1}$ | $M_{n,\text{SEC}}^a$ $\text{g.mol}^{-1}$ | $\mathcal{D}^a$ |
|--------------|---------|-----------|---------------------|---------------------------------------|------------------------------------------|-----------------|
| 1            | NAM     | 100       | 0.5                 | 1400                                  | 3400                                     | 1.09            |
|              | NIPAM   | 100       | overnight           | 2500                                  | 6300                                     | 1.32            |
| 2            | NAM     | 100       | 1                   | 1400                                  | 3400                                     | 1.09            |
|              | NIPAM   | 45        | overnight           | 2500                                  | 4500                                     | 1.30            |
| 3            | NAM     | 100       | 2                   | 1400                                  | 3500                                     | 1.06            |
|              | NIPAM   | 20        | overnight           | 2500                                  | 3500                                     | 1.08            |

<sup>a</sup> DMF SEC, calibrating with PMMA standard.

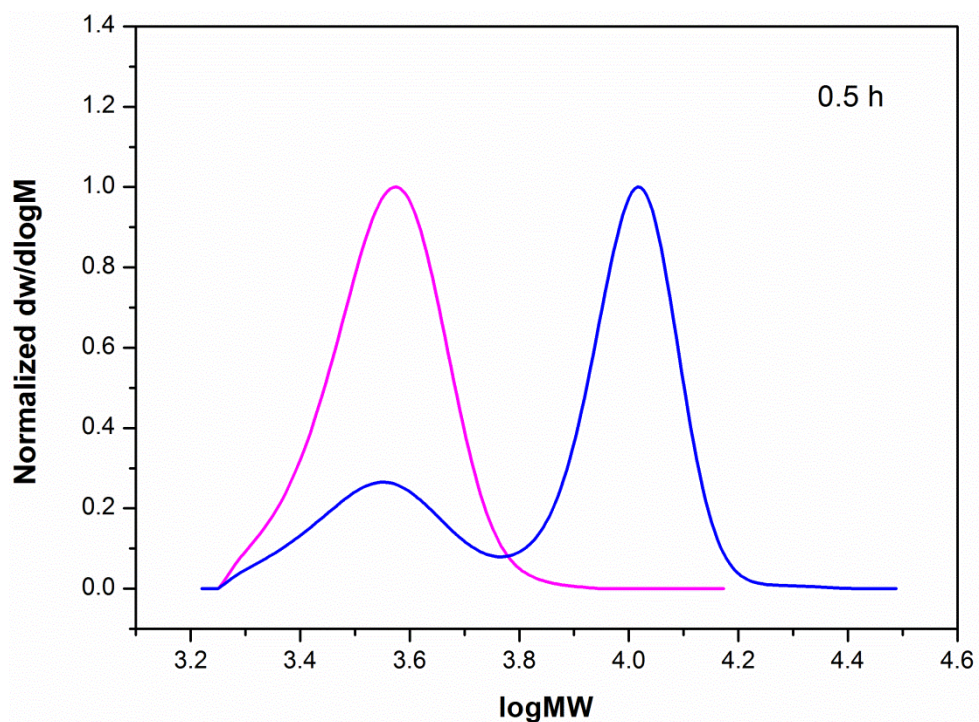

**Figure S21:** DMF SEC for the chain extension of PNAM with deoxygenated aqueous NIPAM (10 eq) after a 0.5 hour delay.  $[M]_0 : [I]_0 : [CuBr] : [Me_6TREN] = [10] : [1] : [0.04] : [0.04]$ .

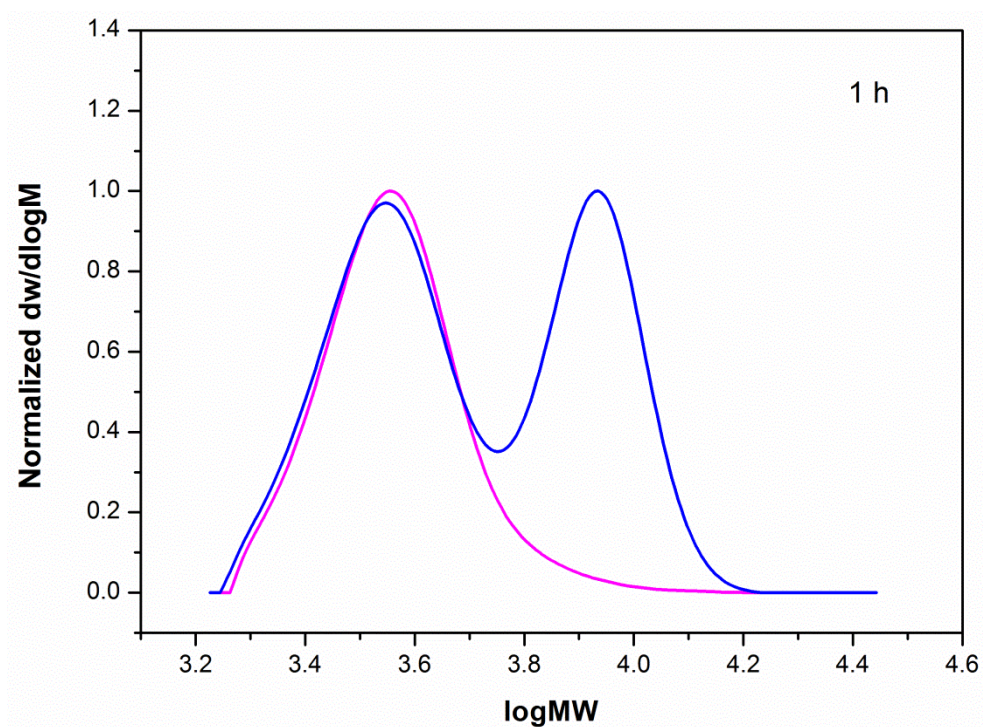

**Figure S22:** DMF SEC for the chain extension of PNAM with deoxygenated aqueous NIPAM (10 eq) after a 1 hour delay.  $[M]_0 : [I]_0 : [CuBr] : [Me_6TREN] = [10] : [1] : [0.04] : [0.04]$ .

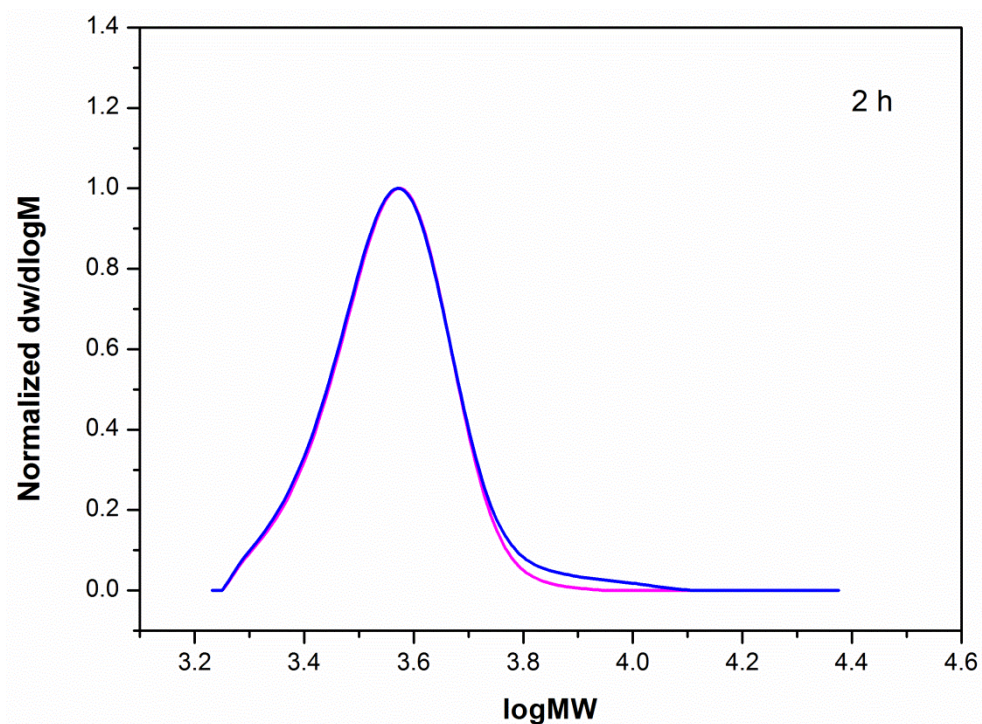

**Figure S23:** DMF SEC for the chain extension of PNAM with deoxygenated aqueous NIPAM (10 eq) after a 2 hour delay.  $[M]_0 : [I]_0 : [CuBr] : [Me_6TREN] = [10] : [1] : [0.04] : [0.04]$ .

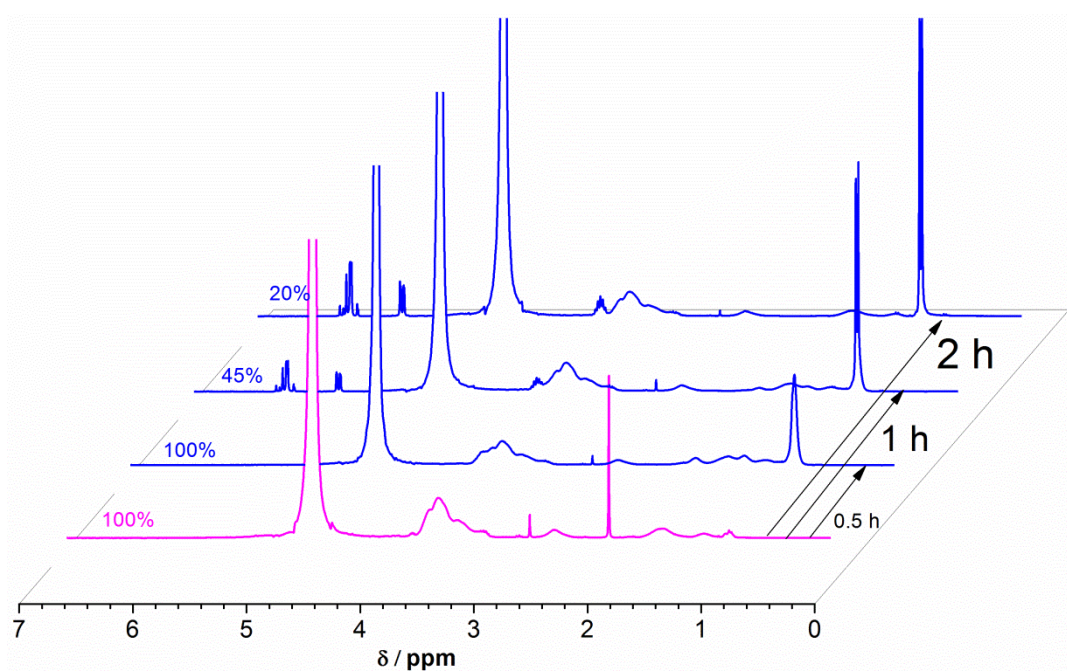

**Figure S24:**  $^1H$ NMR ( $D_2O$ ) for the chain extension of PNAM with deoxygenated aqueous NIPAM (10 eq) after various time delays.

**Table S11:** Investigating the effect of time of chain end fidelity of PDEA under aqueous SET-LRP conditions.  $[M]_0 : [I]_0 : [CuBr] : [Me_6TREN] = [10] : [1] : [0.04] : [0.04]$ .

| Reaction No. | Monomer | Conv. (%) | Time per block (hr) | $M_{n,th}$ g.mol <sup>-1</sup> | $M_{n,SEC}^a$ g.mol <sup>-1</sup> | $\mathcal{D}^a$ |
|--------------|---------|-----------|---------------------|--------------------------------|-----------------------------------|-----------------|
| 1            | DEA     | 100       | 0.5                 | 1500                           | 2600                              | 1.53            |
|              | NIPAM   | 98        | overnight           | 2600                           | 3200                              | 1.15            |
| 2            | DEA     | 100       | 1                   | 1500                           | 2600                              | 1.51            |
|              | NIPAM   | 65        | overnight           | 2600                           | 3300                              | 1.40            |
| 3            | DEA     | 100       | 2                   | 1500                           | 2600                              | 1.53            |
|              | NIPAM   | 30        | overnight           | 2600                           | 2600                              | 1.54            |

<sup>a</sup> DMF SEC, calibrating with PMMA standard.

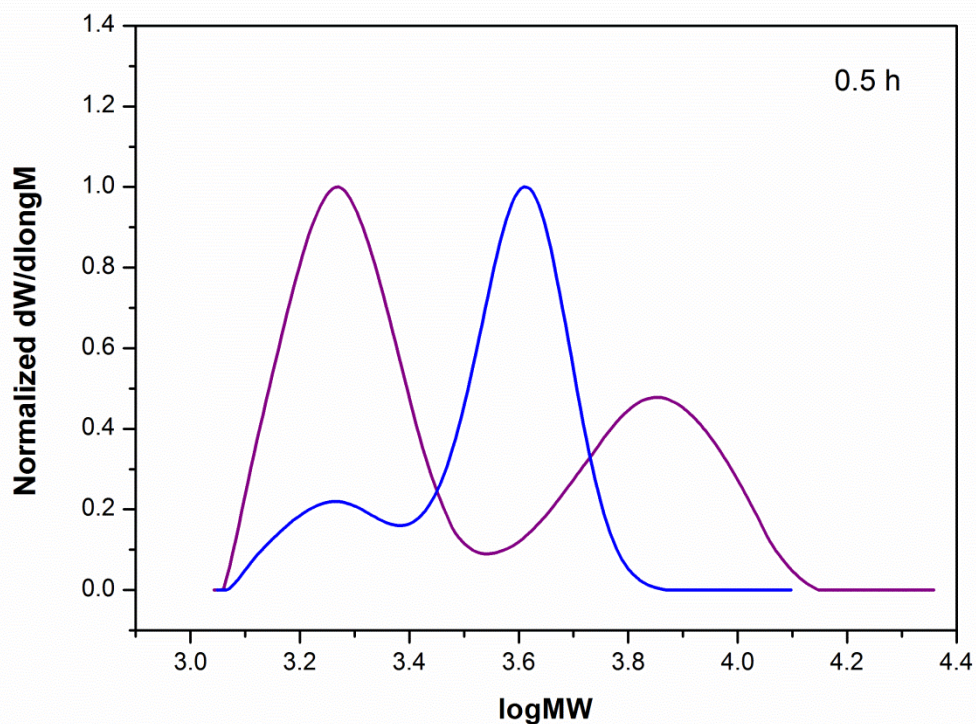

**Figure S25:** DMF SEC for the chain extension of PDEA with deoxygenated aqueous NIPAM (10 eq) after a 0.5 hour delay.  $[M]_0 : [I]_0 : [CuBr] : [Me_6TREN] = [10] : [1] : [0.04] : [0.04]$ .

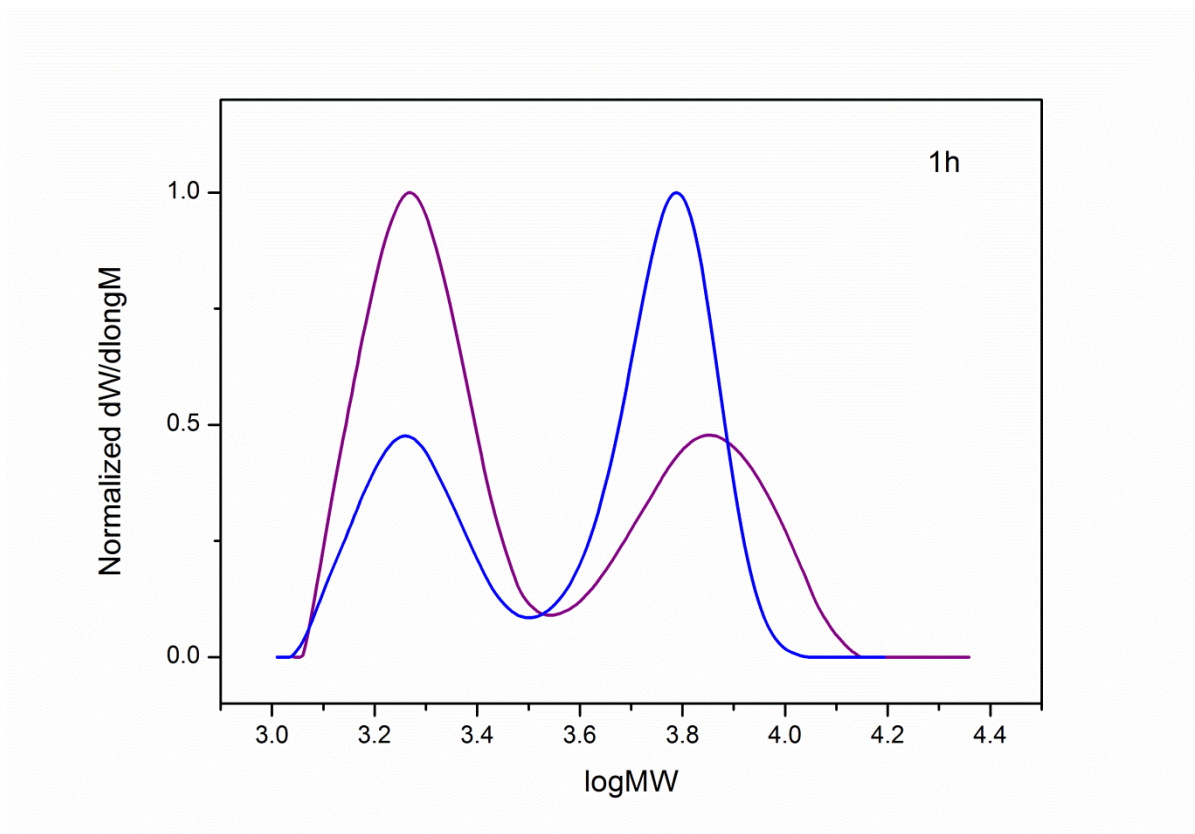

**Figure S26:** DMF SEC for the chain extension of PDEA with deoxygenated aqueous NIPAM (10 eq) after a 1 hour delay.  $[M]_0 : [I]_0 : [CuBr] : [Me_6TREN] = [10] : [1] : [0.04] : [0.04]$ .



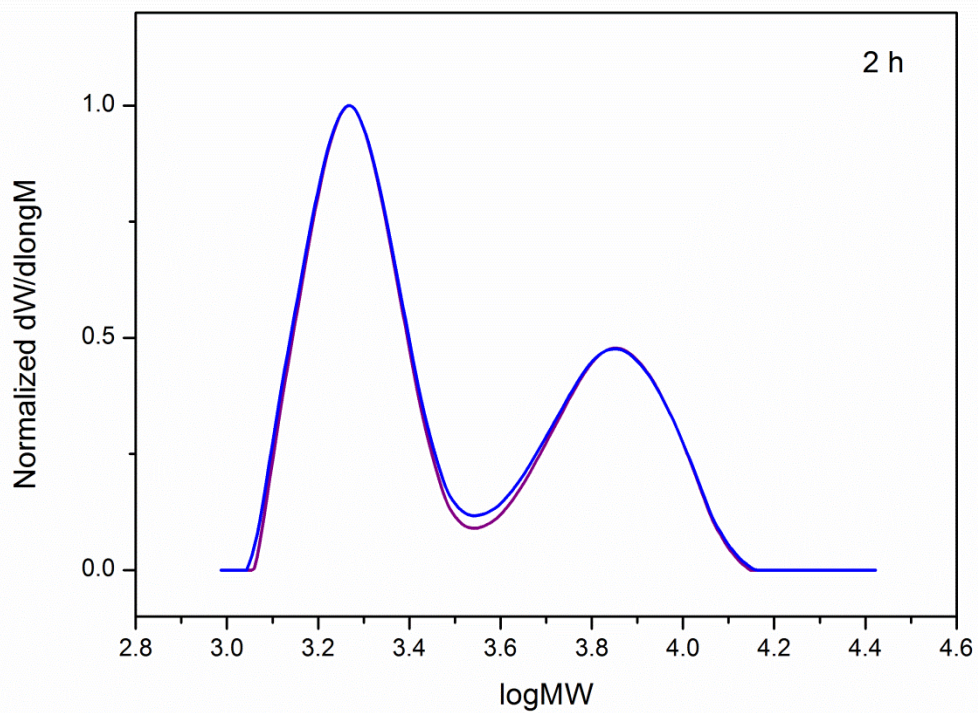

**Figure S27:** DMF SEC for the chain extension of PDEA with deoxygenated aqueous NIPAM (10 eq) after a 2 hour delay.  $[M]_0 : [I]_0 : [CuBr] : [Me_6TREN] = [10] : [1] : [0.04] : [0.04]$ .

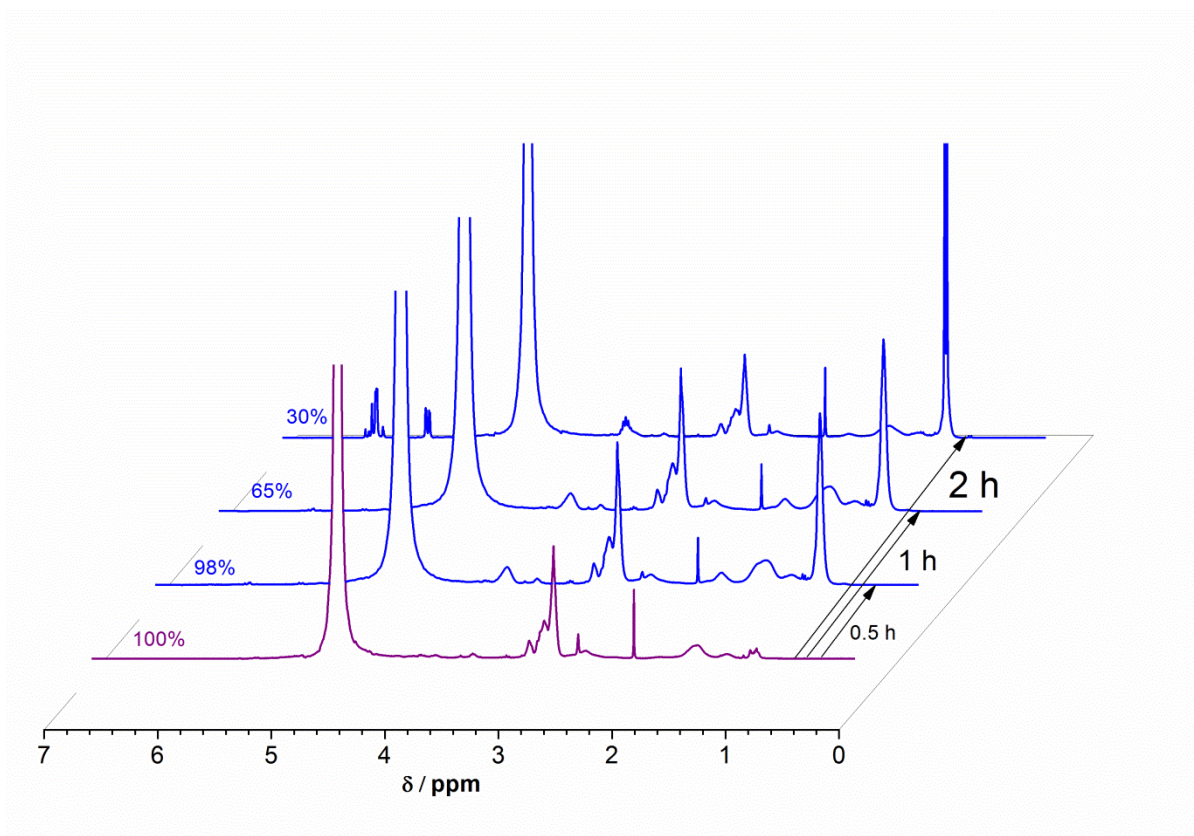

**Figure S28:**  $^1\text{H}$ NMR ( $\text{D}_2\text{O}$ ) for the chain extension of PDEA with deoxygenated aqueous NIPAM (10 eq) after various time delays.

**Table S12:** Investigating the effect of time of chain end fidelity of PNIPAM under aqueous SET-LRP conditions.  $[\text{M}]_0 : [\text{I}]_0 : [\text{CuBr}] : [\text{Me}_6\text{TREN}] = [10] : [1] : [0.04] : [0.04]$ .

| Reaction No. | Monomer | Conv. (%) | Time per block (hr) | $M_{n,\text{th}}$ $\text{g}\cdot\text{mol}^{-1}$ | $M_{n,\text{SEC}}^a$ $\text{g}\cdot\text{mol}^{-1}$ | $D^a$ |
|--------------|---------|-----------|---------------------|--------------------------------------------------|-----------------------------------------------------|-------|
| 1            | NIPAM   | 100       | 2                   | 1400                                             | 2400                                                | 1.07  |
|              | DMA     | 100       | overnight           | 2400                                             | 4600                                                | 1.07  |
| 2            | NIPAM   | 100       | 3                   | 1400                                             | 2400                                                | 1.09  |
|              | DMA     | 97        | overnight           | 2400                                             | 5200                                                | 1.11  |
| 3            | NIPAM   | 100       | 4                   | 1400                                             | 2400                                                | 1.07  |
|              | DMA     | 28        | overnight           | 2400                                             | 3800                                                | 1.12  |
| 4            | NIPAM   | 100       | 10                  | 1400                                             | 2400                                                | 1.07  |
|              | DMA     | 00        | overnight           | 2400                                             | 2500                                                | 1.09  |

<sup>a</sup> DMF SEC, calibrating with PMMA standard.

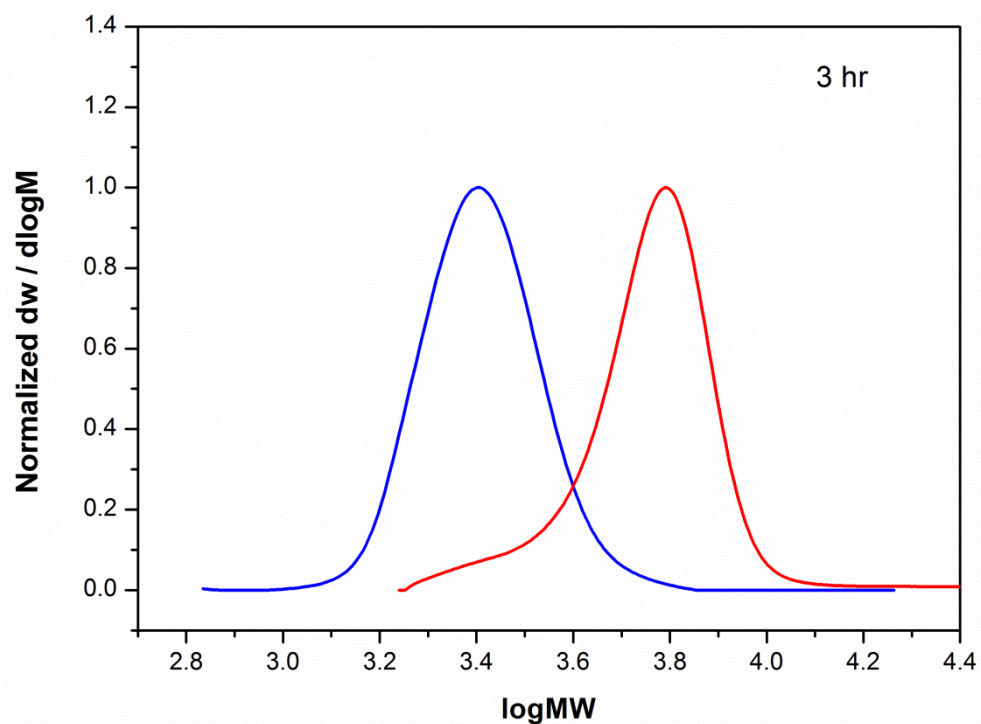

**Figure S29:** DMF SEC for the chain extension of PNIPAM with deoxygenated aqueous DMA (10 eq) after a 3 hour delay.  $[M]_0 : [I]_0 : [CuBr] : [Me_6TREN] = [10] : [1] : [0.04] : [0.04]$ .

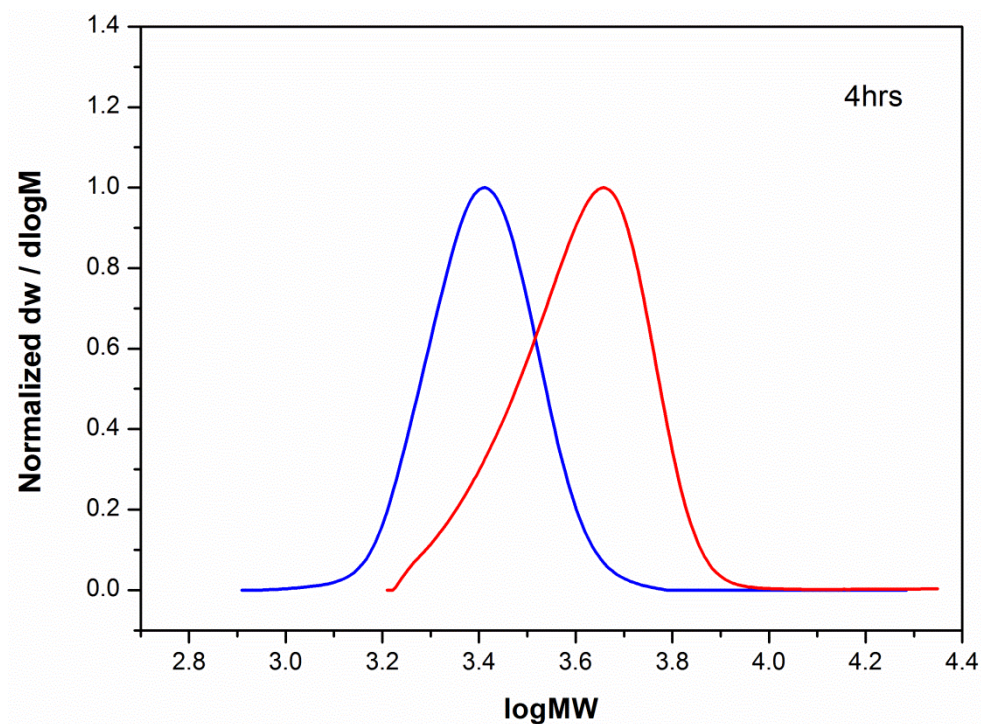

**Figure S30:** DMF SEC for the chain extension of PNIPAM with deoxygenated aqueous DMA (10 eq) after a 4 hour delay.  $[M]_0 : [I]_0 : [CuBr] : [Me_6TREN] = [10] : [1] : [0.04] : [0.04]$ .

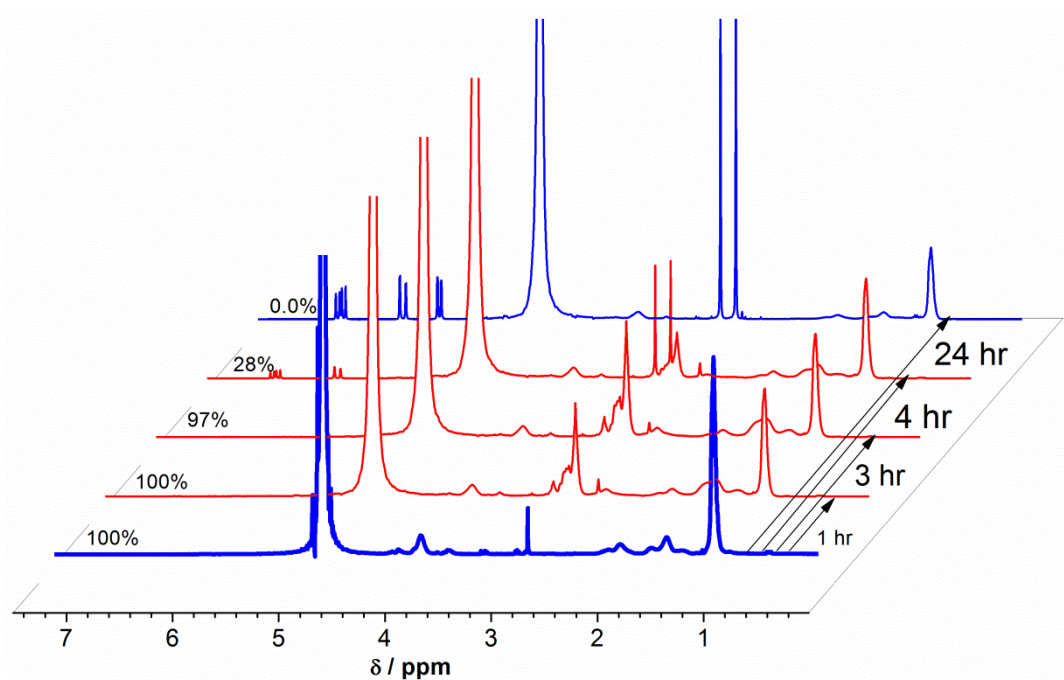

**Figure S31:**  $^1\text{H}$ NMR ( $\text{D}_2\text{O}$ ) for the chain extension of PNIPAM with deoxygenated aqueous DMA (10 eq) after various time delays.

**Table S13:** Investigating the effect of time of chain end fidelity of PNIPAM under aqueous SET-LRP conditions.  $[\text{M}]_0 : [\text{I}]_0 : [\text{CuBr}] : [\text{Me}_6\text{TREN}] = [10] : [1] : [0.04] : [0.04]$ .

| Reaction No. | Monomer | Conv. (%) | Time per block (hr) | $M_{n,\text{th}}$<br>$\text{g}\cdot\text{mol}^{-1}$ | $M_{n,\text{SEC}}^a$<br>$\text{g}\cdot\text{mol}^{-1}$ | $\mathcal{D}^a$ |
|--------------|---------|-----------|---------------------|-----------------------------------------------------|--------------------------------------------------------|-----------------|
| 1            | DMA     | 100       | 0.5                 | 1200                                                | 2800                                                   | 1.08            |
|              | DMA     | 100       | overnight           | 2200                                                | 5600                                                   | 1.27            |
| 2            | DMA     | 100       | 1                   | 1200                                                | 2700                                                   | 1.06            |
|              | DMA     | 50        | overnight           | 2200                                                | 40000                                                  | 1.34            |
| 3            | DMA     | 100       | 2                   | 1200                                                | 2700                                                   | 1.06            |
|              | DMA     | 15        | overnight           | 2200                                                | 2800                                                   | 1.15            |

<sup>a</sup> DMF SEC, calibrating with PMMA standard.

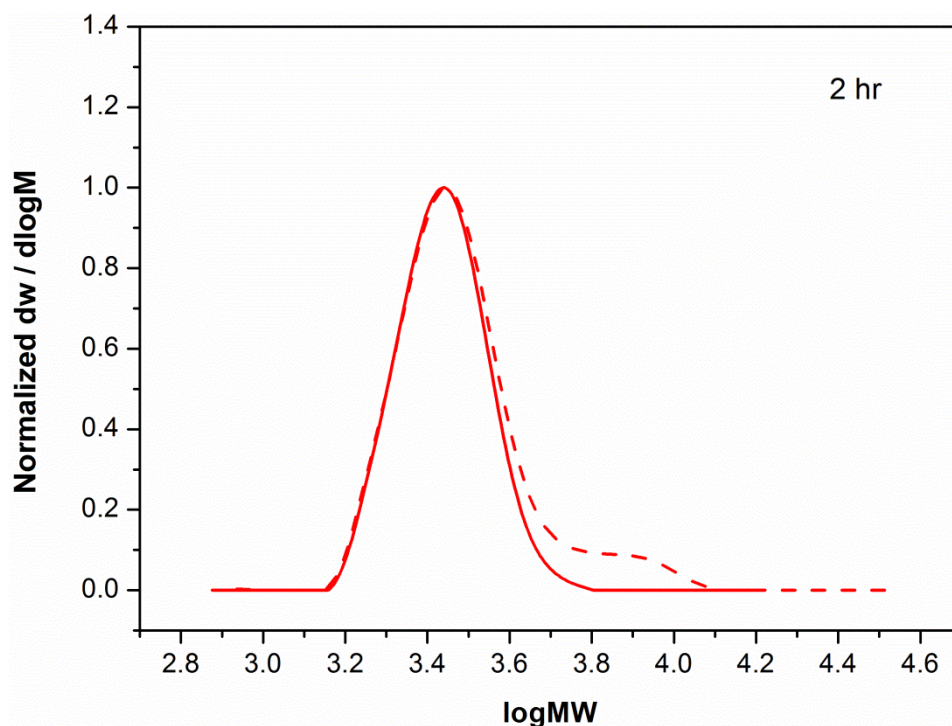

**Figure S32:** DMF SEC for the chain extension of PDMA with deoxygenated aqueous DMA (10 eq) after a 2 hour delay.  $[M]_0 : [I]_0 : [CuBr] : [Me_6TREN] = [10] : [1] : [0.04] : [0.04]$ .

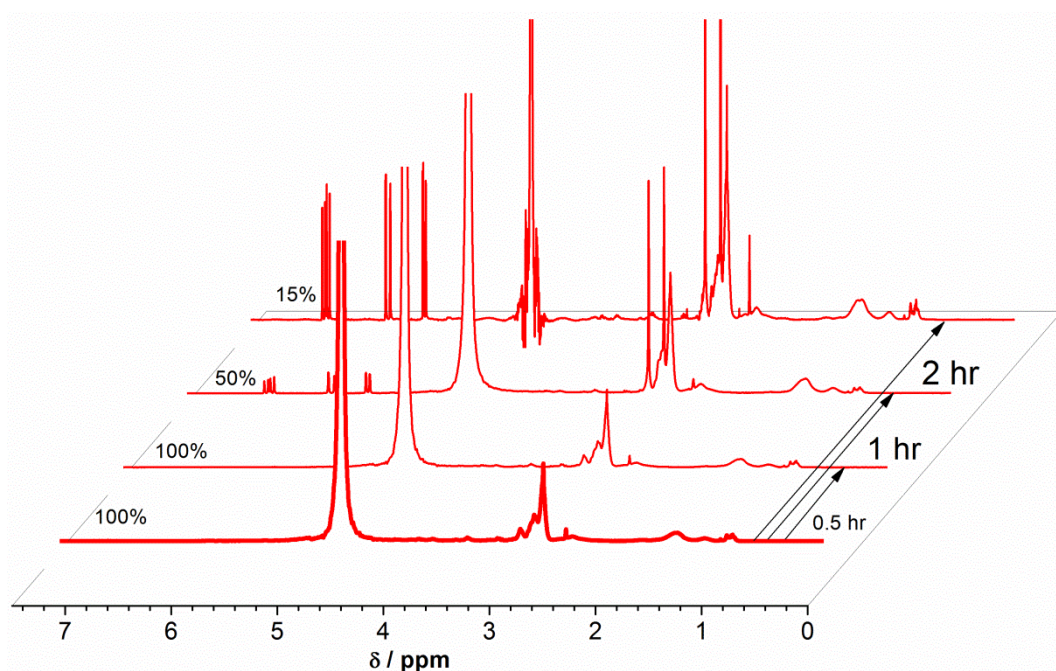

**Figure S33:**  $^1H$ NMR ( $D_2O$ ) for the chain extension of PDMA with deoxygenated aqueous DMA (10 eq) after various time delays

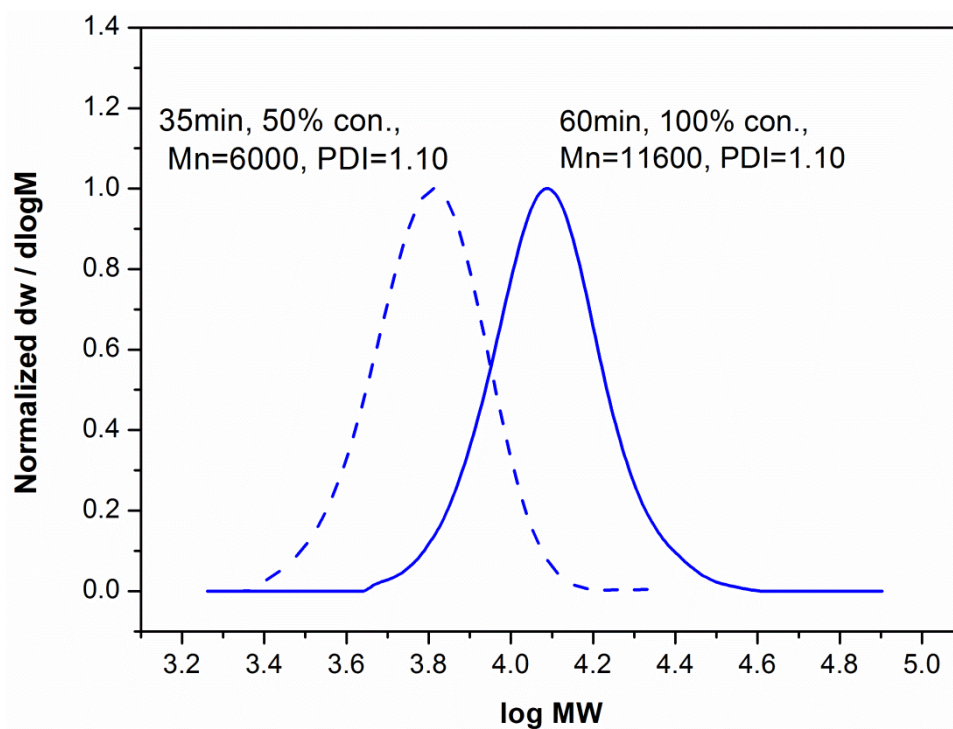

**Figure S34:** DMF SEC of higher molecular weight PNIPAM prepared by aqueous SET-LRP.

[M] : [I] : [CuBr] : [Me<sub>6</sub>TREN] = [100] : [1] : [0.008] : [0.004]

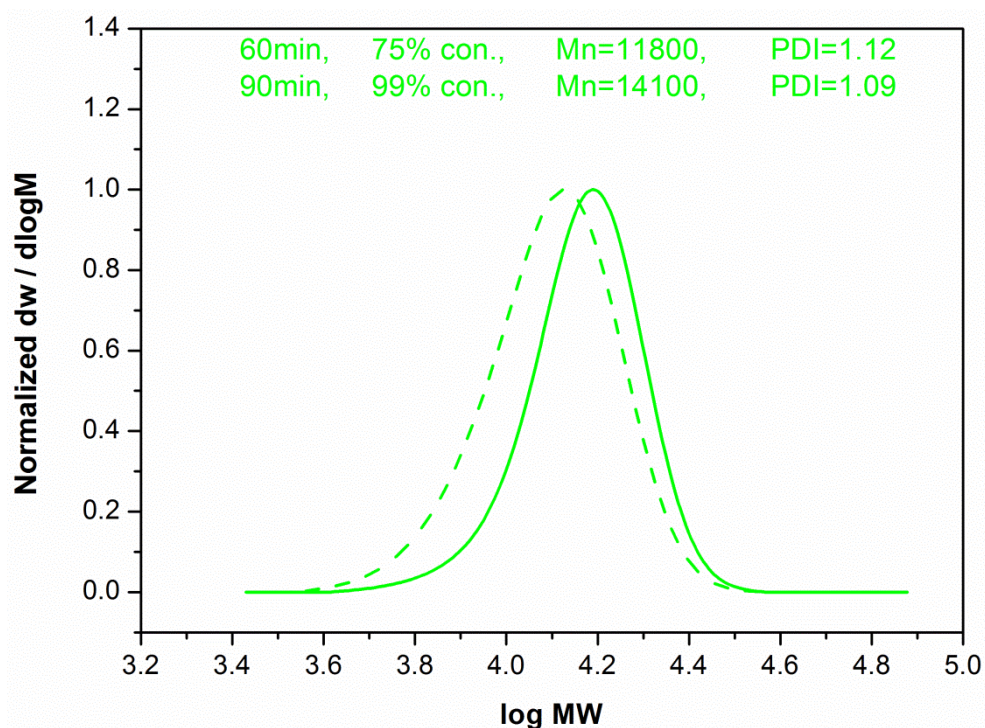

**Figure S35:** DMF SEC of higher molecular weight PHEAA prepared by aqueous SET-LRP.

[M] : [I] : [CuBr] : [Me<sub>6</sub>TREN] = [100] : [1] : [0.008] : [0.004]

**Table S14:** Preparation of higher molecular weight triblock homopolymer prepared by sequential addition of deoxygenated aliquots of aqueous NIPAM (100 eq) to PNIPAM during SET-LRP at 0 °C in H<sub>2</sub>O. [M]<sub>0</sub> : [I]<sub>0</sub> : [CuBr] : [Me<sub>6</sub>TREN] = [100] : [1] : [0.008] : [0.004].

| Entry | Block number | Monomer | Conv. (%) | Time per block (min) <sup>a</sup> | $M_{n,th}$<br>g·mol <sup>-1</sup> | $M_{n,SEC}^b$<br>g·mol <sup>-1</sup> | $\mathcal{D}^b$ |
|-------|--------------|---------|-----------|-----------------------------------|-----------------------------------|--------------------------------------|-----------------|
| 1     | Block 1      | NIPAM   | 100       | 60 (60)                           | 11600                             | 11600                                | 1.11            |
| 2     | Block 2      | NIPAM   | 100       | 90 (150)                          | 22900                             | 19800                                | 1.09            |
| 3     | Block 3      | NIPAM   | 100       | Overnight                         | 34200                             | 38800                                | 1.08            |

<sup>a</sup> Cumulative time in parentheses. <sup>b</sup> DMF SEC, calibrating with PMMA standard.

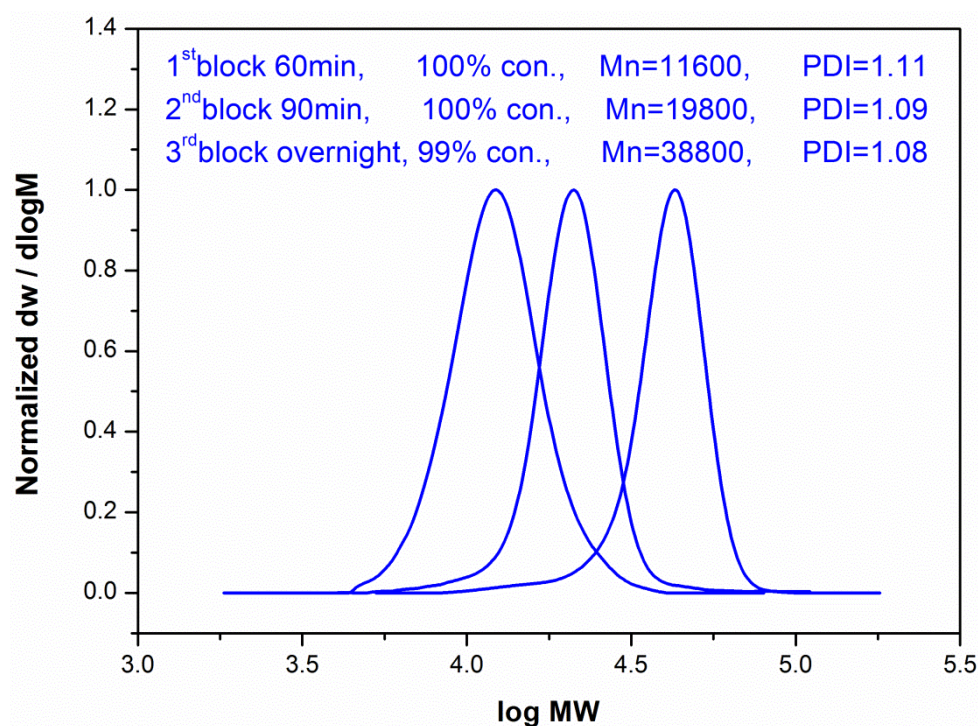

**Figure S36:** Evolution of block molecular weight by DMF SEC for high molecular weight triblock of PNIPAM. [M]<sub>0</sub> : [I]<sub>0</sub> : [CuBr] : [Me<sub>6</sub>TREN] = [100] : [1] : [0.008] : [0.004]

## References

- (1) Perrier, S.; Armes, S. P.; Wang, X. S.; Malet, F.; Haddleton, D. M. *J. Polym. Sci., Part A: Polym. Chem.* **2001**, *39*, 1696.
- (2) Ciampolini, M.; Nardi, N. *Inorganic Chemistry* **1966**, *5*, 41.
- (3) Queffelec, J.; Gaynor, S. G.; Matyjaszewski, K. *Macromolecules* **2000**, *33*, 8629.
- (4) R.N. Keller and H.D. Wycoff, *Inorganic Synthesis*, 1946, **2**, 1-4.
